# Supplementary material for: Characterising the dynamic movement of thunderstorms using very low- and low-frequency (VLF/LF) total lightning data over the Pearl River Delta region
Source: Copernicus journal article supplement (doi:10.5194/acp-22-10045-2022), 2022-08-05
Supplement: Supplementary file 1 [file acp-22-10045-2022-supplement.zip]

Archive with 2 entries (2 files):
- supporting data.xlsx
- acp-22-10045-2022-supplement-title-page.pdf
