# Supplementary material for: Characterising the dynamic movement of thunderstorms using very low- and low-frequency (VLF/LF) total lightning data over the Pearl River Delta region
Source: Copernicus journal article supplement (doi:10.5194/acp-22-10045-2022), 2022-08-05
Supplement: Supplementary file 1 [file acp-22-10045-2022-supplement.zip › acp-22-10045-2022-supplement-title-page.pdf]

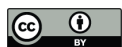

*Supplement of*

**Characterising the dynamic movement of thunderstorms using very low- and low-frequency (VLF/LF) total lightning data over the Pearl River Delta region**

**Si Cheng et al.**

*Correspondence to:* Jianguo Wang (wjg@whu.edu.cn) and Li Cai (caili@whu.edu.cn)

- acp-22-10045-2022-supplement-title-page.pdf
- supporting data.xlsx

The copyright of individual parts of the supplement might differ from the article licence.
