# Supplementary material for: Characterising the dynamic movement of thunderstorms using very low- and low-frequency (VLF/LF) total lightning data over the Pearl River Delta region
Source: Copernicus journal article supplement (doi:10.5194/acp-22-10045-2022), 2022-08-05
Supplement: Supplementary file 1 [file acp-22-10045-2022-supplement.zip › supporting data.xlsx]

## Sheet: Sheet1
Time	Latitude	Longitude	Height	Polarity
20140517000002	22.0385	113.056	14.0119	32
20140517000002	24.1241	113.538	8.41962	15
20140517000002	24.1402	113.539	11.0336	13
20140517000002	22.0392	113.055	14.0532	13
20140517000003	24.3413	113.885	0	-22
20140517000003	24.3606	113.898	13.5684	13
20140517000003	24.3554	113.894	0.489445	-15
20140517000003	24.3576	113.901	10.2876	15
20140517000003	22.0268	113.007	13.4073	32
20140517000003	22.5001	113.662	8.24872	13
20140517000003	24.0677	113.704	0	-21
20140517000003	22.5099	113.65	10.3057	15
20140517000003	24.0998	113.73	0	-20
20140517000003	24.1244	113.728	11.9434	-13
20140517000003	24.0925	113.725	0	-20
20140517000003	24.0977	113.726	0	-20
20140517000003	24.0946	113.742	11.8145	-15
20140517000003	24.1843	113.688	3.5233	-13
20140517000003	22.4596	113.731	0.076785	15
20140517000003	24.1118	113.733	0	-20
20140517000003	24.1208	113.68	11.5507	-13
20140517000003	24.0721	113.711	0	-20
20140517000005	22.0307	113.047	14.6285	15
20140517000005	22.0304	113.048	14.8149	13
20140517000005	22.0511	113.046	15.2633	13
20140517000005	22.0379	113.048	11.3856	15
20140517000005	22.0552	113.044	14.8829	15
20140517000005	22.0549	113.064	0	21
20140517000005	22.0583	113.056	10.9094	15
20140517000005	22.0277	113.049	15.2518	-15
20140517000005	22.0334	113.026	16.6447	15
20140517000006	22.8451	113.751	7.62265	13
20140517000006	21.6529	112.96	18.1106	15
20140517000006	22.8434	113.739	7.75103	13
20140517000006	22.8551	113.736	8.24839	13
20140517000008	22.6978	114.783	0.178756	13
20140517000008	22.6547	114.88	0.088821	-15
20140517000009	22.6848	114.69	0.352197	15
20140517000010	22.0399	113.018	15.6688	13
20140517000011	22.0448	113.08	14.6973	15
20140517000011	22.0327	113.083	17.3666	13
20140517000011	22.0506	113.073	15.4868	15
20140517000011	22.0357	113.075	15.9657	15
20140517000011	22.0279	113.072	11.3234	13
20140517000011	22.7831	113.81	7.07001	15
20140517000012	22.79	113.822	0.011631	15
20140517000013	23.5397	114.128	0.204047	15
20140517000013	23.5418	114.135	7.20712	15
20140517000013	24.1119	113.739	11.9851	13
20140517000014	23.8638	113.306	10.2206	13
20140517000014	23.8729	113.31	11.3616	13
20140517000014	23.8625	113.307	10.659	15
20140517000014	23.8645	113.308	10.0408	15
20140517000014	24.0618	113.769	12.826	15
20140517000014	24.0821	113.669	6.42264	-15
20140517000014	23.8618	113.335	11.0024	15
20140517000014	23.856	113.338	8.76146	13
20140517000017	22.8454	113.773	7.42836	15
20140517000017	22.8488	113.785	7.98511	15
20140517000017	22.8556	113.773	9.84058	15
20140517000017	22.8598	113.761	8.82344	15
20140517000017	22.8672	113.768	9.91222	13
20140517000017	22.8641	113.764	6.97193	-15
20140517000018	22.0584	113.052	0.066799	-15
20140517000018	22.0774	113.05	0	-20
20140517000018	22.0197	113.056	8.3823	-13
20140517000018	22.0273	113.052	8.7515	15
20140517000018	22.056	113.052	0	-20
20140517000018	22.0675	113.05	8.00602	-14
20140517000018	22.0527	113.051	0	-20
20140517000018	22.02	113.045	10.0293	-13
20140517000018	22.046	113.078	0	-21
20140517000019	22.0119	113.064	0	20
20140517000019	22.0579	113.05	6.62732	-13
20140517000019	24.1221	113.69	14.6445	13
20140517000019	24.062	113.647	0	-20
20140517000020	22.0538	113.06	13.1846	15
20140517000020	22.0542	113.077	11.1083	15
20140517000020	22.0354	113.056	15.8059	15
20140517000022	24.171	113.481	8.91132	15
20140517000025	21.6027	113	15.7939	-15
20140517000025	21.7303	112.983	0	-20
20140517000025	21.7239	112.985	0	-21
20140517000025	21.7404	113.006	14.435	15
20140517000025	21.7193	112.98	10.8776	15
20140517000025	21.734	112.983	0	-20
20140517000025	21.7249	112.981	0	-21
20140517000025	21.7325	112.982	0	-21
20140517000025	21.7258	112.982	0	-21
20140517000027	22.0427	113.04	14.9045	13
20140517000028	22.7151	114.776	0	23
20140517000029	24.0926	113.65	0	-20
20140517000029	24.0847	113.678	0	-20
20140517000029	24.0979	113.68	4.4894	-15
20140517000029	24.0927	113.685	0	-21
20140517000029	24.0897	113.683	0	-20
20140517000029	24.0783	113.649	8.28433	-15
20140517000029	24.0945	113.681	0	-21
20140517000029	23.8514	113.386	10.1044	15
20140517000029	23.8417	113.386	9.29577	15
20140517000029	23.8216	113.39	7.29895	15
20140517000029	22.0357	113.051	15.1108	13
20140517000031	22.3512	113.581	7.96087	13
20140517000031	22.3543	113.577	8.82083	15
20140517000031	22.3594	113.573	9.38055	15
20140517000031	22.3717	113.588	8.74658	15
20140517000032	22.7056	114.756	0.019922	13
20140517000032	22.6914	114.805	0.283288	15
20140517000034	22.4967	113.718	6.27711	15
20140517000034	22.5046	113.704	7.05967	13
20140517000034	22.4993	113.723	7.29525	15
20140517000034	22.5117	113.71	7.77428	13
20140517000035	21.8632	113.044	12.1957	15
20140517000035	21.8929	113.078	13.5413	15
20140517000036	24.0593	113.709	0.016623	-15
20140517000038	22.0419	113.022	15.4262	13
20140517000039	22.0294	113.06	12.3526	15
20140517000039	22.0155	113.062	13.3794	13
20140517000039	22.0019	113.065	16.4873	13
20140517000039	22.0222	113.063	13.5708	13
20140517000039	22.043	113.046	12.1066	15
20140517000040	22.0213	113.043	15.5749	13
20140517000041	24.0816	113.685	9.89529	15
20140517000041	24.1031	113.689	11.8628	-15
20140517000042	22.8441	113.747	6.19012	15
20140517000042	22.8443	113.745	8.39991	13
20140517000042	22.8442	113.761	6.99128	15
20140517000042	22.8647	113.783	9.07797	-15
20140517000043	22.118	113.095	10.8412	15
20140517000043	22.103	113.1	11.3988	13
20140517000043	22.0908	113.133	9.08096	15
20140517000043	22.049	113.128	13.99	13
20140517000043	22.1099	113.095	11.7639	13
20140517000043	21.9901	113.121	14.7632	-13
20140517000044	22.0345	113.1	9.26827	-13
20140517000044	21.9804	113.094	0	21
20140517000044	23.9941	113.362	10.571	13
20140517000044	23.8521	113.305	9.8197	15
20140517000046	22.0416	113.011	14.3432	15
20140517000046	22.0083	113.011	14.245	13
20140517000049	22.7072	114.751	0.073043	15
20140517000049	22.0183	113.043	13.5602	15
20140517000049	22.0236	113.039	15.6757	13
20140517000049	22.0426	113.039	12.6066	13
20140517000049	22.0334	113.045	11.328	13
20140517000050	22.0697	113.034	14.9687	15
20140517000050	22.0207	113.043	10.7145	15
20140517000050	22.0265	113.037	0	-21
20140517000052	24.1256	113.543	8.16377	-15
20140517000052	24.1233	113.541	7.89543	-13
20140517000052	24.0798	113.52	0.015291	-15
20140517000052	24.0946	113.533	0	-22
20140517000052	24.1351	113.546	11.1062	-15
20140517000052	24.1796	113.578	6.45303	-13
20140517000053	24.0799	113.759	11.1466	15
20140517000053	24.0777	113.758	11.0708	15
20140517000053	24.1262	113.756	15.9818	13
20140517000053	24.0515	113.754	10.1607	-15
20140517000053	24.2	113.794	14.6727	15
20140517000058	22.1283	113.022	0	-20
20140517000058	22.0362	113.036	10.0646	15
20140517000058	22.0701	113.025	0	-21
20140517000058	22.0581	113.025	0	-21
20140517000058	22.0829	113.025	0	-20
20140517000058	22.0662	113.023	0	-20
20140517000058	22.0852	113.024	0	-20
20140517000058	22.0666	113.023	0	-21
20140517000059	22.0689	113.023	0	-21
20140517000059	21.9831	113.139	10.3968	13
20140517000059	21.977	113.048	10.6452	15
20140517000059	22.0507	113.025	7.72302	-13
20140517000100	22.8652	113.756	10.2391	15
20140517000100	22.8621	113.758	11.2815	15
20140517000100	22.8648	113.77	6.45754	13
20140517000100	24.1055	113.692	0	-20
20140517000100	24.0495	113.653	0	-20
20140517000100	22.8656	113.766	9.82692	15
20140517000100	22.842	113.814	0.439031	15
20140517000100	22.8364	113.737	7.70711	13
20140517000100	22.8146	113.783	7.43581	-15
20140517000100	22.8488	113.781	0	21
20140517000100	22.847	113.81	3.46978	15
20140517000101	22.7814	113.772	8.80459	15
20140517000103	22.4951	113.673	8.03061	32
20140517000103	22.4901	113.678	9.01171	13
20140517000103	22.0162	113.04	16.5172	13
20140517000104	22.0618	113.043	15.9621	15
20140517000104	22.0328	113.038	12.3924	15
20140517000104	22.0544	113.044	15.7794	15
20140517000104	22.0201	113.04	15.9598	15
20140517000104	22.0553	113.04	0	-20
20140517000104	22.0476	113.039	0	-20
20140517000107	22.0629	113.165	10.0273	15
20140517000107	22.0583	113.167	12.6249	15
20140517000107	22.0761	113.164	10.9795	15
20140517000109	23.862	113.335	8.26953	15
20140517000109	23.8541	113.311	9.54389	13
20140517000109	23.9034	113.33	11.216	13
20140517000109	22.4157	113.542	8.05673	13
20140517000109	22.4197	113.54	8.62413	15
20140517000109	22.4207	113.538	9.32884	15
20140517000110	22.4301	113.518	10.1265	13
20140517000110	22.4229	113.536	7.11587	15
20140517000110	22.4376	113.528	7.21467	15
20140517000113	22.6927	114.785	0.162628	13
20140517000113	22.7094	114.729	0.010439	13
20140517000113	22.7085	114.726	7.5678	-15
20140517000113	22.6766	114.845	0	23
20140517000114	22.6388	114.923	0.569024	13
20140517000114	22.8463	113.755	7.28673	13
20140517000114	22.8526	113.758	8.65171	15
20140517000116	22.0451	113.051	15.5912	15
20140517000117	26.3475	114.475	0	-20
20140517000118	22.0406	113.057	9.82178	-15
20140517000118	22.0582	113.051	0	-20
20140517000118	22.0775	113.056	0	-20
20140517000118	22.0585	113.052	0	-21
20140517000118	22.0131	113.057	10.6445	-13
20140517000118	22.0601	113.06	0	-20
20140517000118	22.0271	113.047	10.6825	-15
20140517000118	22.0537	113.047	0	-21
20140517000118	22.0119	113.056	11.5266	15
20140517000118	22.0232	113.048	0	-21
20140517000119	21.9122	113.049	0	-21
20140517000119	24.0855	113.656	9.92613	15
20140517000119	24.0909	113.654	12.1007	13
20140517000119	21.9576	113.115	10.7422	15
20140517000119	24.1088	113.746	10.2122	-13
20140517000119	22.4832	113.704	1.92479	-13
20140517000119	22.5429	113.612	0.061929	-15
20140517000119	22.4826	113.691	0	-20
20140517000119	22.5095	113.67	9.04072	15
20140517000120	23.6434	114.092	9.48665	15
20140517000123	22.0359	113.068	14.8786	15
20140517000124	22.0233	113.068	14.9397	13
20140517000125	21.7514	112.98	12.9716	15
20140517000125	21.756	112.977	12.1382	13
20140517000125	21.748	112.975	15.522	13
20140517000126	21.9297	113.065	14.1106	15
20140517000126	22.0155	113.071	15.9637	15
20140517000126	21.8642	113.087	0	20
20140517000126	21.9717	113.075	9.45235	13
20140517000126	24.4976	113.802	15.6521	15
20140517000126	24.3995	113.741	10.0686	13
20140517000126	24.3992	113.746	12.0041	15
20140517000126	24.4747	113.79	16.1324	15
20140517000127	22.047	113.032	14.575	15
20140517000127	22.0349	113.032	14.4167	32
20140517000128	22.058	113.029	16.4408	15
20140517000129	22.0214	113.032	13.9475	13
20140517000129	22.0176	113.037	10.6874	13
20140517000129	22.0721	113.051	14.816	13
20140517000129	22.9033	114.35	0.518275	15
20140517000129	22.8998	114.39	0.144446	13
20140517000129	22.8976	114.454	0.178732	13
20140517000132	18.4782	110.178	0	21
20140517000133	22.3604	113.596	8.28148	15
20140517000133	22.711	114.753	0.252646	15
20140517000134	22.0078	113.003	13.8584	13
20140517000134	22.7185	114.613	0.280412	15
20140517000137	24.1122	113.705	10.7215	-15
20140517000137	24.0804	113.656	0	-20
20140517000137	23.9268	113.552	0.010199	-15
20140517000137	24.0623	113.646	0	20
20140517000137	24.1396	113.755	16.1377	-15
20140517000137	23.8644	113.329	10.1951	-15
20140517000137	23.547	114.132	0.075368	13
20140517000137	23.5493	114.136	3.07845	15
20140517000138	23.8646	113.342	11.5387	-13
20140517000138	23.8504	113.339	7.99574	13
20140517000138	23.55	114.177	7.87173	-15
20140517000139	24.2011	113.476	12.4113	15
20140517000139	24.2141	113.434	0	-20
20140517000140	22.007	113.055	16.4405	15
20140517000140	22.046	113.044	12.219	13
20140517000140	22.0116	113.09	15.8688	-13
20140517000140	22.0439	113.055	14.1067	15
20140517000140	22.0325	113.043	10.5621	13
20140517000141	22.0391	113.042	11.1463	13
20140517000141	22.0131	113.019	15.7001	-13
20140517000141	22.1228	113.077	11.1829	15
20140517000141	22.0632	113.102	0	-21
20140517000146	22.025	113.039	15.8532	13
20140517000146	22.0235	113.04	16.6896	13
20140517000146	22.7065	114.863	0.928764	15
20140517000146	22.7214	114.789	0.324903	15
20140517000146	22.7067	114.857	0.078268	15
20140517000147	24.08	113.68	6.29293	13
20140517000147	24.0934	113.69	12.1877	15
20140517000147	24.0986	113.669	14.7564	15
20140517000147	24.1062	113.676	15.5275	13
20140517000147	21.7459	112.954	13.5563	15
20140517000147	24.0946	113.666	15.4171	15
20140517000147	24.1244	113.691	15.0409	15
20140517000148	24.0856	113.762	10.7644	13
20140517000148	22.5183	113.656	9.42906	13
20140517000148	22.4972	113.692	9.0802	15
20140517000148	22.8556	113.768	6.8907	13
20140517000148	22.8522	113.769	7.59471	13
20140517000148	22.8502	113.772	6.77773	15
20140517000148	22.8542	113.761	9.79676	15
20140517000148	22.8577	113.754	11.1106	15
20140517000148	22.858	113.766	6.48446	15
20140517000149	22.8556	113.785	1.84207	15
20140517000149	22.8562	113.759	0	-20
20140517000149	22.8504	113.777	9.94889	13
20140517000149	23.5159	113.196	8.35091	15
20140517000149	23.5189	113.196	8.41352	13
20140517000149	23.5212	113.191	9.1306	15
20140517000149	22.8175	113.805	2.78278	13
20140517000150	24.0924	113.734	0	-20
20140517000150	24.0935	113.735	0	-20
20140517000150	24.132	113.746	1.07841	-13
20140517000151	23.6219	114.074	8.62935	13
20140517000154	22.0812	113.14	12.2769	13
20140517000154	22.0818	113.139	12.7232	15
20140517000154	22.1048	113.141	12.5314	-13
20140517000154	22.051	113.045	14.5028	13
20140517000154	22.0375	113.05	12.7871	13
20140517000154	22.0401	113.044	11.3967	15
20140517000154	22.0482	113.045	15.918	15
20140517000154	22.0068	113.046	12.3404	13
20140517000155	22.0151	113.045	16.3101	15
20140517000155	21.9751	113.06	17.0776	13
20140517000157	21.8665	113.054	12.6708	15
20140517000157	25.6258	113.032	0	-20
20140517000201	22.709	114.805	0	-20
20140517000201	22.7219	114.794	0	-21
20140517000201	22.7092	114.763	8.05	-15
20140517000201	22.7042	114.807	0	-20
20140517000201	22.7059	114.799	0	-20
20140517000201	22.7171	114.863	0	-21
20140517000201	22.7052	114.81	0	-20
20140517000201	22.7052	114.798	0	-20
20140517000201	22.7302	114.777	0.047094	15
20140517000201	22.7134	114.763	0	-23
20140517000201	22.6722	114.835	0.138282	13
20140517000201	22.7032	114.809	0	-20
20140517000201	22.6323	114.842	1.07641	-15
20140517000201	22.7071	114.792	0	-21
20140517000202	24.0857	113.688	0	-20
20140517000202	24.0988	113.701	12.391	-15
20140517000202	24.1375	113.718	0	-21
20140517000202	24.0896	113.678	0	-20
20140517000205	22.8583	113.767	9.44533	15
20140517000205	22.8586	113.772	0	-20
20140517000205	22.8353	113.827	5.09908	-13
20140517000205	22.8248	113.839	6.56621	-15
20140517000205	22.8215	113.85	4.276	-13
20140517000205	22.7881	113.87	2.85783	15
20140517000205	22.8951	113.853	0	-20
20140517000205	22.9193	113.419	4.46066	15
20140517000205	22.824	113.84	4.07223	-15
20140517000205	22.7742	113.821	0.0635	15
20140517000207	23.5923	114.046	7.61882	13
20140517000207	22.0592	113.048	13.6534	13
20140517000208	21.9804	113.024	13.1281	13
20140517000210	21.7828	112.969	17.6589	15
20140517000210	21.6601	112.962	17.3397	15
20140517000210	22.0313	113.013	13.6272	15
20140517000210	23.8958	113.326	11.9177	15
20140517000210	22.0503	113.042	12.4015	15
20140517000210	22.057	113.05	13.5103	15
20140517000210	22.0421	113.056	9.17043	15
20140517000210	23.8454	113.354	12.314	15
20140517000210	23.8847	113.333	0	21
20140517000214	22.703	114.511	0.214976	15
20140517000215	22.718	114.778	0	22
20140517000215	22.7125	114.789	0	21
20140517000218	24.0757	113.681	13.03	15
20140517000219	24.0537	113.657	13.5489	15
20140517000219	24.0863	113.677	15.2202	15
20140517000219	24.1513	113.575	11.381	15
20140517000219	24.1376	113.567	11.3303	15
20140517000219	24.1269	113.557	13.4086	15
20140517000219	24.122	113.557	12.5845	13
20140517000223	22.1208	113.086	11.3457	32
20140517000223	22.0915	113.092	13.533	13
20140517000223	22.0925	113.092	13.7528	13
20140517000223	22.1056	113.089	13.1486	15
20140517000223	22.1041	113.08	15.2046	15
20140517000223	22.0954	113.088	12.4516	15
20140517000223	22.0438	113.091	15.1956	-13
20140517000224	24.5947	112.409	24.4646	15
20140517000225	22.5198	113.652	0.024492	15
20140517000225	22.4657	113.738	0	-20
20140517000225	22.4539	113.759	0	-23
20140517000225	22.4546	113.756	0.768844	-13
20140517000225	22.454	113.758	0	-20
20140517000225	22.4553	113.757	0.00098	-13
20140517000225	22.5103	113.678	0.440745	-13
20140517000226	24.0863	113.666	0	-21
20140517000226	24.1369	113.684	0	-22
20140517000226	24.1246	113.693	8.64716	13
20140517000227	24.1185	113.659	0	-21
20140517000228	22.8562	113.775	0	21
20140517000228	22.8496	113.774	8.94227	13
20140517000228	22.8547	113.775	6.62812	13
20140517000228	22.8371	113.795	10.1	13
20140517000228	22.8389	113.751	10.6251	13
20140517000229	22.8398	113.752	11.0161	15
20140517000229	22.8394	113.752	10.5527	15
20140517000229	23.939	113.386	0	-20
20140517000229	22.0712	113.046	13.7478	13
20140517000230	22.0391	113.033	14.5648	32
20140517000230	22.0314	113.034	15.3733	13
20140517000230	24.1134	113.748	0	-20
20140517000230	24.1128	113.745	0	-20
20140517000230	24.1381	113.705	0	-22
20140517000230	24.1419	113.708	0	-21
20140517000230	24.1151	113.766	9.90214	13
20140517000231	24.1334	113.706	0	-21
20140517000231	24.1379	113.702	0	-21
20140517000232	21.7462	112.968	13.2167	12
20140517000232	21.7542	112.943	17.9687	15
20140517000232	22.0571	113.172	11.3381	15
20140517000232	21.7064	112.937	18.71	15
20140517000233	22.019	113.131	14.8172	15
20140517000233	22.0676	113.059	14.3426	15
20140517000233	22.0309	113.059	14.9471	13
20140517000233	22.0517	113.055	17.0385	15
20140517000233	22.083	113.05	16.0553	15
20140517000234	22.0396	113.022	14.8581	13
20140517000236	22.7284	114.862	0	-22
20140517000236	22.7312	114.794	0.422634	15
20140517000239	22.0997	113.042	3.66668	-15
20140517000239	22.0808	113.047	0	-20
20140517000239	22.0957	113.052	5.90016	-13
20140517000239	22.055	113.043	8.04551	15
20140517000239	22.0727	113.048	0	-21
20140517000239	22.0882	113.053	6.65544	-13
20140517000240	22.0942	113.052	0	-20
20140517000240	22.0886	113.054	0	-21
20140517000240	22.092	113.053	0	-21
20140517000242	24.0796	113.681	8.59921	15
20140517000242	24.1016	113.696	13.5203	13
20140517000242	23.5599	114.182	0.044249	-15
20140517000242	23.5607	114.172	1.01235	-15
20140517000242	23.5613	114.157	0	-20
20140517000242	24.0799	113.68	0	21
20140517000242	23.5476	114.203	0	-20
20140517000242	23.4808	114.012	0.235025	15
20140517000242	24.1041	113.719	10.8458	13
20140517000242	24.1072	113.768	13.3048	15
20140517000242	21.8766	113.075	11.8729	-15
20140517000242	21.8991	113.081	9.6533	-15
20140517000242	21.9189	113.077	8.3438	-13
20140517000242	21.9245	113.084	10.3536	-13
20140517000243	21.9225	113.078	7.97314	-13
20140517000243	21.9175	113.079	9.96329	-13
20140517000247	24.4289	113.708	0	21
20140517000247	22.0437	113.016	13.5942	15
20140517000247	22.0446	113.034	13.8515	13
20140517000248	22.05	113.06	15.037	15
20140517000248	22.0883	113.061	14.1696	15
20140517000248	22.0247	113.043	0	21
20140517000248	22.0193	113.066	11.5372	15
20140517000248	22.0152	113.07	15.4682	13
20140517000248	21.725	112.966	15.7516	15
20140517000248	22.0185	113.016	14.3249	13
20140517000251	23.893	113.383	11.1353	13
20140517000251	23.8784	113.378	8.42153	13
20140517000251	19.3987	110.796	24.4074	13
20140517000252	22.8525	113.779	0.005078	-15
20140517000252	22.8524	113.787	3.03997	-15
20140517000252	22.8286	113.899	0.369141	-15
20140517000252	22.8629	113.775	0.178936	-15
20140517000252	22.8469	113.805	0	-20
20140517000252	22.8501	113.795	0.006566	-13
20140517000252	22.8489	113.789	0.006467	-15
20140517000252	22.8517	113.792	0	-20
20140517000253	22.8414	113.809	2.49744	13
20140517000253	22.8551	113.766	11.4542	15
20140517000253	22.8402	113.802	6.68147	15
20140517000253	22.8395	113.803	7.40133	13
20140517000253	22.8504	113.791	0.082382	-15
20140517000253	22.8375	113.807	3.53818	15
20140517000253	22.827	113.818	5.12343	15
20140517000253	22.8263	113.81	7.06889	15
20140517000253	22.8389	113.777	7.62153	15
20140517000253	22.8189	113.801	9.033	13
20140517000253	22.8145	113.807	8.86899	13
20140517000253	22.8547	113.782	6.37699	-13
20140517000253	22.852	113.788	10.0436	13
20140517000253	22.8495	113.806	0	21
20140517000253	22.8556	113.787	10.2539	13
20140517000253	22.8583	113.782	10.5564	15
20140517000253	22.8701	113.79	0.12278	15
20140517000254	22.0923	113.104	12.3052	13
20140517000254	22.1049	113.103	11.6464	13
20140517000256	21.7333	112.975	10.3674	-15
20140517000256	21.7182	113	9.73208	-13
20140517000256	21.7434	112.964	0	-20
20140517000256	21.6944	112.964	12.0969	-13
20140517000259	21.7877	113.057	15.4062	-13
20140517000259	22.037	113.079	10.1257	-13
20140517000259	21.7639	113.053	14.5132	-15
20140517000300	22.0085	113.066	9.80054	15
20140517000301	24.231	113.512	11.749	15
20140517000301	24.2158	113.505	13.1173	15
20140517000302	22.7411	114.804	0.038198	15
20140517000303	24.0816	113.707	0	-20
20140517000303	24.1628	113.768	0	-20
20140517000303	24.1167	113.731	7.7698	15
20140517000303	24.0895	113.71	0	-20
20140517000303	24.0565	113.692	0	-20
20140517000303	24.0547	113.692	0	-20
20140517000304	22.0535	113.025	14.714	13
20140517000304	24.0699	113.694	11.7995	13
20140517000304	24.0542	113.691	0	-20
20140517000304	24.0784	113.713	9.29491	15
20140517000304	22.0645	113.04	12.6334	15
20140517000304	22.0796	113.037	14.121	15
20140517000304	22.0454	113.046	11.7099	15
20140517000304	22.061	113.05	10.8002	15
20140517000304	22.0383	113.056	9.19947	15
20140517000304	22.0563	113.035	0	21
20140517000304	22.0881	113.048	11.4986	15
20140517000304	22.0272	113.051	0	20
20140517000304	22.0335	113.054	15.5543	-15
20140517000309	23.8793	113.328	10.5727	15
20140517000309	23.8847	113.332	9.62085	13
20140517000311	22.8713	113.773	9.9704	13
20140517000312	22.8708	113.776	10.0742	32
20140517000314	22.0401	113.023	15.1047	15
20140517000315	22.0633	113.067	14.3952	15
20140517000315	22.0269	113.068	14.2812	13
20140517000315	22.1059	113.072	16.1057	-15
20140517000315	21.9947	113.104	17.3569	15
20140517000316	22.8592	113.782	6.79254	32
20140517000316	22.8612	113.775	7.48452	13
20140517000316	22.8621	113.779	6.90964	15
20140517000316	22.8632	113.785	7.15033	13
20140517000316	22.8633	113.778	8.33706	13
20140517000316	22.8585	113.773	9.41913	15
20140517000316	22.8561	113.775	10.0963	13
20140517000316	22.8556	113.774	10.705	13
20140517000316	22.8448	113.779	9.67098	-13
20140517000316	22.8556	113.785	6.30169	13
20140517000316	22.8753	113.763	11.6983	13
20140517000317	24.0829	113.687	16.0151	15
20140517000317	24.0737	113.687	9.28031	13
20140517000318	24.1199	113.671	11.6289	15
20140517000318	24.1091	113.652	12.976	15
20140517000320	22.7839	113.827	4.8839	15
20140517000320	22.7851	113.833	3.63447	13
20140517000320	22.8091	113.84	5.89015	15
20140517000321	21.174	112.801	14.0034	13
20140517000323	24.1104	113.732	0	-20
20140517000323	24.1206	113.709	0	-21
20140517000325	23.6055	114.061	8.04475	13
20140517000325	23.6195	114.06	7.83028	-15
20140517000328	23.8872	113.388	10.9554	13
20140517000328	22.0825	113.065	14.8317	15
20140517000328	22.0107	113.074	12.1056	13
20140517000328	22.0579	113.053	9.72842	13
20140517000329	22.0153	113.068	0	20
20140517000329	22.0415	113.069	0	20
20140517000329	22.0486	113.083	15.0836	-13
20140517000330	22.0614	113.161	11.7154	13
20140517000330	22.0849	113.158	10.1751	15
20140517000330	22.0844	113.117	14.367	13
20140517000330	22.0658	113.163	10.2813	13
20140517000331	22.0633	113.161	10.8829	13
20140517000331	22.4196	113.545	7.81025	15
20140517000331	22.4172	113.548	7.89167	15
20140517000331	22.434	113.534	8.99673	15
20140517000331	22.4244	113.544	10.3439	13
20140517000331	22.4291	113.537	9.25818	15
20140517000331	22.4247	113.538	9.71243	13
20140517000331	22.855	113.79	6.8223	15
20140517000331	22.3695	113.534	9.68436	15
20140517000331	22.8442	113.76	10.3714	15
20140517000331	22.3581	113.554	10.6819	-15
20140517000331	22.8612	113.785	5.52052	13
20140517000331	22.8475	113.764	9.20506	13
20140517000331	22.8468	113.819	5.67025	15
20140517000332	22.7405	114.789	0	-20
20140517000332	22.9707	113.37	58.096	15
20140517000332	22.732	114.791	0	-20
20140517000332	22.9082	113.369	0.212869	15
20140517000332	22.7366	114.792	0.299148	15
20140517000332	22.7302	114.788	0	-20
20140517000332	22.7398	114.757	0	-23
20140517000332	22.7284	114.797	0	-20
20140517000335	21.7757	112.957	13.6023	13
20140517000335	21.7721	112.973	11.6606	15
20140517000336	21.7292	112.969	12.5297	15
20140517000336	21.6868	112.98	13.556	13
20140517000336	23.5355	114.157	0	23
20140517000336	23.5333	114.149	2.52828	15
20140517000338	22.0324	113.054	8.07283	-15
20140517000338	22.1098	113.051	0	-22
20140517000338	22.0616	113.072	0	-21
20140517000338	22.0675	113.067	0	-20
20140517000338	22.0651	113.075	0	-21
20140517000338	22.0721	113.066	0	-20
20140517000338	22.0348	113.068	6.04526	-13
20140517000338	22.0703	113.065	0	-21
20140517000338	21.986	113.094	10.6918	-13
20140517000338	22.0247	113.122	6.55589	15
20140517000338	22.0386	113.029	10.8309	15
20140517000338	22.0736	113.065	0	-20
20140517000338	22.007	113.077	10.1324	13
20140517000339	22.0362	113.027	14.9483	13
20140517000339	22.0687	113.066	0	-20
20140517000340	24.19	113.484	11.8527	13
20140517000340	22.0544	113.059	15.5511	13
20140517000341	23.8716	113.326	11.218	13
20140517000341	23.8609	113.324	9.3887	15
20140517000341	23.8726	113.318	8.4062	-15
20140517000344	23.6036	114.064	5.42626	-15
20140517000344	23.6032	114.064	1.95861	-15
20140517000344	23.6102	114.071	3.29878	-13
20140517000344	23.6133	114.095	0	-21
20140517000344	23.6112	114.088	0	-22
20140517000344	23.6145	114.099	4.94397	15
20140517000344	23.6209	114.103	0	-20
20140517000345	22.3414	113.48	9.76501	15
20140517000345	22.3364	113.481	10.3115	13
20140517000345	22.3484	113.479	8.32376	15
20140517000346	22.1211	113.123	7.34035	-13
20140517000346	22.5206	113.666	5.27435	-15
20140517000346	22.4374	113.788	0.027532	-15
20140517000346	22.5128	113.676	0.096752	-15
20140517000346	22.5252	113.666	0.116551	-15
20140517000346	22.5096	113.671	0	-20
20140517000346	22.009	114.148	298.457	-15
20140517000346	22.5158	113.684	0.006379	15
20140517000346	22.4962	113.685	8.169	-15
20140517000346	22.4638	113.751	0.202458	-13
20140517000346	22.4785	113.728	0.253155	-13
20140517000350	22.8608	113.788	8.03388	15
20140517000350	22.862	113.786	9.10701	13
20140517000350	22.858	113.776	10.1739	13
20140517000350	22.8564	113.776	10.3239	15
20140517000350	22.8743	113.768	12.1697	-13
20140517000350	22.8711	113.772	12.0989	15
20140517000350	22.8695	113.765	12.1202	15
20140517000350	22.8503	113.782	4.13467	15
20140517000355	24.079	113.724	2.69933	-15
20140517000355	24.0819	113.75	0	-20
20140517000355	24.1183	113.776	0	-20
20140517000355	24.0987	113.735	5.2135	-15
20140517000355	24.1052	113.741	12.5138	-13
20140517000355	24.0642	113.734	0	-20
20140517000356	24.1091	113.768	0	-20
20140517000356	24.1114	113.771	0	-21
20140517000356	24.1251	113.717	5.69593	13
20140517000357	22.0067	113.052	13.1066	13
20140517000357	24.1103	113.697	11.3314	15
20140517000357	22.0074	113.059	15.0265	13
20140517000357	23.8339	113.373	8.75365	15
20140517000357	23.8354	113.382	10.3189	15
20140517000357	22.0398	113.059	12.6369	13
20140517000357	22.0265	113.064	11.5371	15
20140517000357	23.8479	113.4	9.92399	15
20140517000357	22.0102	113.059	12.3457	13
20140517000357	23.8269	113.387	10.4423	15
20140517000357	22.0253	113.101	15.6633	-13
20140517000357	23.7973	113.391	6.99824	13
20140517000357	22.0302	113.075	14.0072	-13
20140517000357	22.0398	113.096	11.0611	13
20140517000357	22.0488	113.054	9.02768	15
20140517000358	24.1111	113.545	0.199773	-15
20140517000359	24.1206	113.553	0	-20
20140517000359	24.1342	113.581	0	-20
20140517000359	24.1863	113.579	0	-20
20140517000401	24.4217	113.959	14.7374	15
20140517000404	22.0591	113.046	13.7293	15
20140517000404	22.6995	114.517	0.1199	13
20140517000404	22.7075	114.478	0.50666	13
20140517000405	22.7226	114.534	0	-23
20140517000405	22.0821	113.049	16.1701	-13
20140517000405	22.7319	114.728	0.039352	-15
20140517000405	22.7148	114.836	0	-20
20140517000405	22.7032	114.809	0	-21
20140517000405	22.7008	114.831	0	-21
20140517000405	22.7078	114.769	0	-20
20140517000405	22.6942	114.776	0.081477	13
20140517000406	22.7311	114.817	0	-20
20140517000406	22.7063	114.812	0	-21
20140517000406	22.6971	114.839	0	-20
20140517000406	22.7231	114.751	1.10148	-15
20140517000406	22.7067	114.813	0	-21
20140517000406	22.7508	114.737	0	20
20140517000407	22.422	113.5	9.65853	13
20140517000408	21.9084	113.093	12.2962	13
20140517000408	21.924	113.043	13.0566	15
20140517000408	21.9183	113.045	15.6209	13
20140517000408	21.9344	113.04	15.2047	13
20140517000408	22.4217	113.498	10.1821	13
20140517000408	21.9644	113.041	15.9436	13
20140517000408	21.9725	113.039	15.8453	-15
20140517000408	23.8787	113.33	11.0287	15
20140517000408	23.8722	113.331	12.4972	15
20140517000414	22.8616	113.778	7.69907	15
20140517000414	22.8622	113.781	8.92261	13
20140517000414	22.859	113.773	10.6602	13
20140517000414	22.856	113.777	11.3061	15
20140517000414	22.8621	113.774	5.71188	15
20140517000414	22.8558	113.787	11.4143	13
20140517000414	22.8616	113.789	6.42763	15
20140517000414	22.8403	113.795	9.38124	-13
20140517000414	22.859	113.779	11.1169	15
20140517000414	22.8343	113.813	4.7721	15
20140517000415	24.1088	113.714	0	-21
20140517000417	24.0829	113.699	12.5334	13
20140517000417	22.0214	113.053	15.231	13
20140517000417	24.0712	113.719	11.3792	13
20140517000417	24.0888	113.732	10.3333	-15
20140517000419	22.7933	113.836	4.51517	13
20140517000419	22.8034	113.804	6.3732	13
20140517000419	22.7935	113.842	5.90615	13
20140517000419	22.7578	113.876	4.538	-13
20140517000419	22.7832	113.808	7.79633	-15
20140517000419	22.8093	113.812	6.20054	-15
20140517000419	22.793	113.84	3.97561	15
20140517000420	22.8564	113.803	2.19768	13
20140517000427	21.7551	112.966	14.6956	32
20140517000427	21.7351	112.972	13.0546	15
20140517000427	21.7559	112.972	0	-20
20140517000427	21.7337	112.976	16.5487	15
20140517000427	21.8598	113.001	14.8566	15
20140517000429	22.0574	113.041	14.7096	13
20140517000429	22.0526	113.042	16.1339	15
20140517000429	26.0852	114.357	36.9591	-15
20140517000429	22.0535	113.044	15.7263	15
20140517000429	22.0849	113.045	15.4326	15
20140517000429	22.0512	113.038	11.436	15
20140517000430	24.2006	113.499	9.62865	15
20140517000430	23.8907	113.338	10.731	13
20140517000434	22.7066	114.799	0.215866	13
20140517000434	22.7002	114.845	0	23
20140517000434	22.7	114.843	0.028282	15
20140517000434	22.701	114.88	0	23
20140517000434	22.7063	114.886	0.367759	13
20140517000435	22.8283	113.8	0.522204	-13
20140517000435	22.838	113.808	0	-20
20140517000435	22.8075	113.816	0.005078	-13
20140517000435	22.818	113.821	0.017814	-15
20140517000435	22.8069	113.835	0.463814	-15
20140517000435	22.809	113.81	2.11778	-13
20140517000435	22.8253	113.801	0.049673	15
20140517000435	22.8369	113.806	0	-20
20140517000435	22.8253	113.817	0	-22
20140517000435	22.8414	113.79	0	-20
20140517000438	21.4585	112.824	6.80696	-15
20140517000438	21.622	112.836	0.58154	-15
20140517000438	21.1556	112.817	0	-20
20140517000438	22.4048	112.901	43.5758	15
20140517000438	21.1173	112.82	0	-21
20140517000438	20.9176	112.815	0.656776	-13
20140517000438	22.1085	113.11	11.8525	15
20140517000438	22.0914	113.11	11.0633	13
20140517000438	22.1058	113.107	11.2186	13
20140517000438	22.1151	113.106	12.1252	13
20140517000438	22.1081	113.104	13.1411	13
20140517000439	22.0877	113.108	13.9504	-15
20140517000439	22.1194	113.098	11.8429	13
20140517000439	22.0684	113.055	9.00205	13
20140517000439	22.047	113.084	10.903	13
20140517000439	22.104	113.105	0	21
20140517000439	21.9983	113.02	15.274	13
20140517000440	24.0781	113.665	14.333	13
20140517000441	24.1013	113.653	13.863	15
20140517000442	23.9126	113.585	0.055708	13
20140517000442	23.9088	113.583	8.85957	15
20140517000442	23.9051	113.582	9.70682	15
20140517000446	23.619	114.079	8.20773	13
20140517000446	23.6063	114.06	8.62015	15
20140517000446	23.6177	114.077	0.012583	13
20140517000446	22.7274	114.843	0	-23
20140517000446	24.0602	113.71	0.759882	-15
20140517000446	24.0898	113.72	0	-20
20140517000446	22.7097	114.775	5.37684	-13
20140517000446	24.1189	113.745	0	-20
20140517000446	22.7661	114.776	0	23
20140517000446	24.1143	113.738	8.36183	15
20140517000446	24.0944	113.724	0	-20
20140517000447	24.0777	113.713	0	-20
20140517000447	24.0737	113.709	0	-20
20140517000447	24.0535	113.693	0	-20
20140517000447	24.0753	113.711	0	-20
20140517000447	24.5497	113.78	1.08102	15
20140517000447	24.4921	113.744	13.0558	15
20140517000447	22.4718	113.721	6.43656	13
20140517000447	22.4786	113.713	7.97699	15
20140517000447	22.4874	113.702	8.68739	15
20140517000447	22.4893	113.701	9.61648	15
20140517000447	22.4849	113.724	10.2914	15
20140517000448	22.0414	113.052	16.0113	15
20140517000448	22.0523	113.059	15.7956	15
20140517000448	22.8707	113.777	8.11483	13
20140517000448	22.8692	113.775	9.11979	13
20140517000448	22.8654	113.776	10.0648	13
20140517000448	22.8564	113.78	11.187	13
20140517000448	22.0097	113.058	15.125	15
20140517000448	22.8418	113.794	9.90529	13
20140517000448	22.8718	113.814	5.175	15
20140517000449	22.0708	113.066	6.81788	-13
20140517000449	22.0865	113.057	6.50692	-13
20140517000449	22.0878	113.057	6.5096	-15
20140517000449	22.0789	113.065	5.66191	-13
20140517000449	22.1241	113.058	0	-20
20140517000449	22.5808	113.057	4.01784	15
20140517000450	22.0869	113.066	0	-20
20140517000452	23.5181	113.206	7.74034	13
20140517000452	23.5184	113.205	8.44569	15
20140517000452	23.515	113.205	7.6714	15
20140517000452	23.5278	113.221	4.86783	15
20140517000452	23.5286	113.224	7.08904	15
20140517000455	22.5364	113.669	9.06468	15
20140517000455	22.5358	113.673	7.1269	13
20140517000457	22.0576	113.049	13.8122	13
20140517000457	22.0528	113.045	15.6426	15
20140517000457	22.0518	113.063	11.597	15
20140517000459	23.8877	113.391	7.14323	-15
20140517000459	23.9308	113.41	0	-20
20140517000500	22.9396	114.406	0.370247	13
20140517000500	22.9696	114.429	0	-20
20140517000500	21.7281	112.972	12.4751	15
20140517000500	21.6995	112.992	17.5575	15
20140517000501	22.8563	113.841	2.02758	15
20140517000501	22.8564	113.837	0.076799	15
20140517000501	22.865	113.811	0	22
20140517000501	22.8452	113.812	2.35986	-13
20140517000501	22.8621	113.797	0.020176	-13
20140517000502	23.56	114.169	0.915441	-15
20140517000502	23.5583	114.167	0.022481	-13
20140517000502	23.5698	114.184	0	-20
20140517000502	23.5583	114.172	5.87153	-13
20140517000502	23.558	114.169	0	-21
20140517000502	23.5615	114.179	0.175943	15
20140517000502	23.5587	114.169	0	-21
20140517000502	23.5601	114.171	0	-21
20140517000502	23.5581	114.169	0	-21
20140517000503	23.5532	114.158	0	-21
20140517000503	23.5607	114.171	0	-21
20140517000505	22.7502	114.736	0.097807	15
20140517000506	22.745	114.801	0	23
20140517000506	22.7483	114.78	0.105357	15
20140517000506	22.714	114.743	0.505096	13
20140517000507	21.7401	112.96	14.6342	13
20140517000507	21.7083	112.957	15.6409	13
20140517000508	22.0195	113.062	0	21
20140517000508	22.0041	113.09	15.3572	-15
20140517000508	22.025	113.077	15.1242	15
20140517000510	19.5944	108.985	0	21
20140517000513	21.1513	112.808	23.9382	15
20140517000515	19.588	111.177	0	22
20140517000516	22.333	113.474	10.8329	-15
20140517000516	24.1951	113.717	16.9442	13
20140517000517	24.1257	113.685	1.65949	15
20140517000517	24.1703	113.705	13.6223	-15
20140517000517	24.1453	113.687	10.8408	13
20140517000517	24.0732	113.672	4.96626	-15
20140517000518	24.0749	113.695	13.8636	-15
20140517000518	22.1225	113.161	2.98764	13
20140517000518	22.0681	113.172	11.6661	13
20140517000518	22.0555	113.173	11.9126	13
20140517000519	22.0611	113.179	10.6582	13
20140517000519	22.1057	113.177	12.8116	-15
20140517000519	24.1157	113.565	7.25842	15
20140517000519	24.1178	113.564	9.85211	15
20140517000519	24.1353	113.573	11.7217	15
20140517000519	24.1252	113.569	11.6566	13
20140517000519	24.1297	113.573	11.1116	13
20140517000520	22.6765	114.808	0.014622	15
20140517000520	22.7041	114.714	10.5688	15
20140517000520	22.6831	114.859	0.011045	15
20140517000520	22.699	114.762	0	21
20140517000521	21.6677	112.231	0.508307	15
20140517000521	26.8687	115.402	26.3043	15
20140517000524	22.046	113.058	13.9	32
20140517000524	22.8547	113.785	6.94421	13
20140517000524	22.8564	113.795	6.60388	13
20140517000524	22.8618	113.782	11.1029	15
20140517000524	23.604	114.081	3.88228	13
20140517000524	23.6022	114.078	1.86216	15
20140517000524	23.6364	114.11	0	-20
20140517000524	22.4272	113.552	8.04657	15
20140517000524	22.4203	113.563	8.81091	15
20140517000524	22.4281	113.553	9.56478	15
20140517000524	22.8605	113.786	10.402	-15
20140517000524	22.4263	113.545	9.3695	15
20140517000524	22.8486	113.816	5.05925	13
20140517000524	23.6066	114.089	3.97993	-15
20140517000524	23.6364	114.11	0	-20
20140517000524	22.4332	113.546	8.56456	13
20140517000524	22.8493	113.788	0	-20
20140517000524	22.4341	113.579	9.52819	13
20140517000524	22.045	113.058	13.9932	13
20140517000525	23.8598	113.329	10.9403	15
20140517000525	23.8557	113.329	10.4971	13
20140517000526	23.8404	113.345	10.5671	-15
20140517000526	23.8991	113.282	8.27457	13
20140517000526	21.7187	112.961	18.4595	13
20140517000527	21.7563	112.962	17.1671	15
20140517000527	24.1422	113.737	7.54053	-15
20140517000527	21.7341	112.945	17.2551	15
20140517000527	24.1178	113.721	0	-21
20140517000527	24.1684	113.808	0	-21
20140517000527	24.1201	113.722	5.17051	-13
20140517000527	22.5	113.702	3.42785	-13
20140517000527	22.53	113.651	0.020637	-15
20140517000527	22.5277	113.678	0	-21
20140517000527	22.4672	113.776	0	-22
20140517000527	24.0704	113.705	7.49793	-13
20140517000527	23.882	113.581	0	-22
20140517000527	22.4655	113.761	0	-21
20140517000528	22.8453	113.796	5.74809	13
20140517000530	22.0022	113.063	13.5231	15
20140517000530	22.0499	113.059	11.9363	15
20140517000530	22.0187	113.067	10.54	15
20140517000530	22.0473	113.055	0	20
20140517000536	24.2292	113.479	12.9862	15
20140517000537	22.7516	114.756	0.355495	13
20140517000537	22.7353	114.844	0.112873	13
20140517000537	22.7454	114.785	0.129217	13
20140517000537	22.8559	113.796	4.46147	15
20140517000537	22.8512	113.796	7.56574	15
20140517000538	22.0795	113.06	0	21
20140517000546	22.7534	114.893	0	22
20140517000546	22.8489	113.739	6.6737	15
20140517000546	22.8487	113.736	7.50504	13
20140517000546	22.8464	113.735	8.78036	13
20140517000546	22.8357	113.74	6.37211	-13
20140517000547	22.7935	113.691	0	-23
20140517000547	22.8112	113.711	5.2087	15
20140517000547	22.7883	113.706	0	-23
20140517000547	22.5514	113.664	8.89251	13
20140517000547	22.7933	113.69	0.04649	-13
20140517000547	22.8402	113.743	5.43942	-13
20140517000547	22.7932	113.692	0	-23
20140517000547	22.8356	113.749	4.4978	13
20140517000547	22.7925	113.694	0	-21
20140517000547	22.7921	113.694	0	-21
20140517000547	22.7921	113.694	0	-21
20140517000547	22.0217	113.093	12.1379	13
20140517000547	22.0415	113.089	13.2186	13
20140517000547	22.0074	113.09	14.4128	13
20140517000547	22.0289	113.09	13.9621	13
20140517000547	22.7878	113.847	0.111862	13
20140517000550	23.9349	113.423	0	-20
20140517000550	23.9282	113.425	0	-21
20140517000551	23.8419	113.398	9.23184	15
20140517000551	23.9186	113.368	11.0205	-13
20140517000551	23.8368	113.407	9.21132	15
20140517000552	24.107	113.718	14.8997	-13
20140517000552	24.0763	113.706	0	20
20140517000552	24.0965	113.714	10.7764	-15
20140517000554	22.8803	113.812	8.60306	13
20140517000554	22.8273	113.833	5.04862	-15
20140517000554	22.8501	113.798	3.77279	-13
20140517000554	22.8099	113.849	3.81321	13
20140517000554	22.8304	113.814	0.008882	13
20140517000555	22.8207	113.825	0.11895	-15
20140517000555	23.6151	114.084	9.64283	-13
20140517000555	23.62	114.08	0	21
20140517000555	23.6227	114.087	0	21
20140517000557	21.761	112.959	15.2138	13
20140517000558	22.0688	113.069	11.6925	13
20140517000558	24.0988	113.683	0	-20
20140517000558	22.0722	113.062	9.83413	13
20140517000558	24.1078	113.76	10.528	-15
20140517000558	24.1042	113.713	0	-20
20140517000558	24.1242	113.775	10.0173	-15
20140517000558	21.7155	113.004	15.2993	13
20140517000558	24.1091	113.715	0	-20
20140517000559	21.745	112.99	16.2783	15
20140517000559	24.0944	113.74	10.9661	-13
20140517000559	22.0296	113.048	16.2887	15
20140517000559	22.046	113.064	0	21
20140517000559	21.7205	112.97	0	20
20140517000601	22.5232	113.733	9.65806	15
20140517000602	23.9052	113.592	8.48	15
20140517000602	23.9098	113.597	8.66127	13
20140517000602	23.9064	113.594	7.95671	15
20140517000603	22.8605	113.806	6.89652	13
20140517000603	22.8469	113.784	10.6897	15
20140517000603	22.847	113.794	11.3668	13
20140517000605	22.1122	113.147	9.83474	-15
20140517000605	22.1355	113.141	0	-20
20140517000605	22.1123	113.136	10.6736	-13
20140517000605	22.1073	113.137	10.9275	-15
20140517000605	22.1125	113.137	9.26292	-15
20140517000605	22.1033	113.139	10.4331	-15
20140517000605	22.0962	113.143	0	-20
20140517000605	22.6063	113.448	50.0712	-15
20140517000605	22.1069	113.146	8.83116	15
20140517000605	22.1373	113.125	9.70123	-13
20140517000605	22.1171	113.106	10.6721	-15
20140517000605	22.1097	113.143	6.91278	-15
20140517000605	22.1328	113.142	0	-20
20140517000605	22.1038	113.169	11.3518	15
20140517000605	22.1136	113.145	0	-20
20140517000605	22.1056	113.146	0	-20
20140517000605	22.1187	113.145	0	-21
20140517000605	22.1046	113.149	0	-21
20140517000605	22.1235	113.144	0	-20
20140517000606	22.1329	113.142	0	-20
20140517000606	22.0472	113.175	9.77938	-13
20140517000606	22.1208	113.144	0	-21
20140517000606	22.1259	113.144	0	-20
20140517000606	22.1092	113.147	0	-21
20140517000606	22.1244	113.143	0	-21
20140517000606	22.1199	113.145	0	-21
20140517000606	22.1398	113.14	0	-20
20140517000609	22.0981	113.082	12.8045	13
20140517000609	22.0972	113.081	13.7361	13
20140517000609	22.1172	113.075	13.1003	15
20140517000609	22.1203	113.077	13.7764	15
20140517000609	22.1041	113.081	14.89	15
20140517000612	21.9235	113.063	13.5328	13
20140517000612	21.9736	113.075	13.6386	15
20140517000613	26.2165	114.041	0	-20
20140517000616	22.4322	113.562	9.50444	13
20140517000616	22.4264	113.567	8.01732	13
20140517000616	22.42	113.575	8.81204	15
20140517000617	22.7623	114.765	0.739537	13
20140517000617	22.7652	114.719	0.308598	15
20140517000617	22.7317	114.793	0.279188	15
20140517000617	22.7371	114.764	0	20
20140517000617	22.7509	114.783	0	20
20140517000618	21.1342	112.824	0	-20
20140517000618	21.0175	112.807	19.0538	-13
20140517000618	21.1872	112.812	0	-20
20140517000620	22.7856	113.785	6.74194	13
20140517000621	22.872	113.789	6.40731	13
20140517000621	22.8728	113.779	8.19882	13
20140517000621	22.8735	113.76	10.1428	13
20140517000621	22.8752	113.762	11.0826	13
20140517000621	22.8748	113.771	11.6553	13
20140517000624	24.1407	113.672	0	-21
20140517000624	24.1052	113.67	0	-20
20140517000624	24.1336	113.708	0	-20
20140517000624	24.1108	113.676	8.90119	15
20140517000624	23.9297	113.399	11.4533	15
20140517000625	22.0406	113.063	13.3682	15
20140517000625	24.2399	113.512	12.5099	15
20140517000625	24.2394	113.512	12.7257	15
20140517000625	22.5469	113.688	7.30838	15
20140517000625	22.5695	113.659	11.5861	15
20140517000625	22.5418	113.701	8.51174	13
20140517000625	22.5466	113.695	9.98767	15
20140517000626	22.5427	113.696	6.76146	13
20140517000626	22.7984	113.841	5.21832	15
20140517000626	22.7963	113.847	4.47488	13
20140517000626	22.8078	113.84	5.2702	13
20140517000626	22.8131	113.84	4.26401	15
20140517000626	22.774	113.876	3.99659	15
20140517000627	22.0998	113.115	14.667	13
20140517000627	22.0903	113.114	14.056	-13
20140517000627	22.0879	113.117	13.8925	-15
20140517000627	22.1415	113.147	10.0363	13
20140517000627	22.13	113.146	10.1347	13
20140517000627	22.1274	113.148	11.0512	15
20140517000627	22.0961	113.145	12.9269	-15
20140517000627	22.0829	113.151	14.5434	-15
20140517000627	22.1292	113.091	11.042	13
20140517000627	22.0924	113.167	10.874	-15
20140517000627	22.0697	113.073	12.1874	13
20140517000628	22.0523	113.163	13.0474	13
20140517000628	22.0574	113.1	10.9029	15
20140517000628	22.0616	113.063	10.2634	15
20140517000631	22.6935	114.771	0.509144	15
20140517000631	22.7012	114.738	0	22
20140517000631	22.7266	114.761	0.427238	13
20140517000632	22.6976	114.777	0	23
20140517000634	22.0345	113.028	11.9469	13
20140517000634	22.0459	113.031	14.3278	13
20140517000634	22.0415	113.03	0	20
20140517000634	22.0459	113.029	11.8518	13
20140517000634	22.0454	113.061	11.2661	13
20140517000634	22.1278	113.033	10.5433	15
20140517000634	22.0436	113.035	0	-21
20140517000634	22.026	113.075	15.3057	-15
20140517000634	22.0396	113.067	0	21
20140517000634	21.9936	113.047	11.2102	-13
20140517000634	22.0556	113.044	9.89929	13
20140517000637	23.544	114.189	4.20119	15
20140517000637	23.5407	114.17	2.59764	15
20140517000637	23.5359	114.161	0	23
20140517000637	23.5511	114.181	2.63734	15
20140517000637	23.5533	114.186	7.34757	15
20140517000637	23.5431	114.173	4.84223	13
20140517000637	23.5595	114.196	8.3244	-15
20140517000638	23.8737	113.332	10.4784	15
20140517000638	23.8698	113.331	10.6683	13
20140517000638	23.8682	113.331	11.1151	15
20140517000638	23.8671	113.334	10.7337	15
20140517000638	22.5374	113.703	7.66896	13
20140517000638	22.5535	113.697	4.78683	15
20140517000638	22.5463	113.687	8.78269	-15
20140517000638	22.5657	113.631	9.58166	-13
20140517000639	22.8782	113.782	0	-22
20140517000639	22.8732	113.797	0.292905	-13
20140517000639	22.8497	113.778	0.048114	-15
20140517000639	22.8532	113.767	0	-20
20140517000639	22.8718	113.769	3.774	-13
20140517000639	22.8599	113.791	4.94593	-13
20140517000639	22.8832	113.79	0.317303	-13
20140517000639	22.8553	113.81	4.01827	15
20140517000639	22.8682	113.77	0.259726	-15
20140517000639	24.1308	113.69	6.66268	13
20140517000639	24.1428	113.692	12.8559	15
20140517000640	24.1399	113.709	9.95415	13
20140517000640	24.1307	113.687	9.0601	13
20140517000641	22.0967	113.107	13.7953	15
20140517000642	21.725	112.985	14.7921	13
20140517000642	21.7455	112.988	16.0479	15
20140517000642	21.7649	112.988	14.7003	15
20140517000642	21.7507	112.994	12.8491	13
20140517000642	21.7282	112.991	0	20
20140517000643	22.7684	114.753	0.231125	15
20140517000648	21.2468	112.809	0	-20
20140517000650	24.075	113.738	0	-20
20140517000651	25.2388	113.56	35.1464	-14
20140517000651	22.0105	113.073	14.1571	13
20140517000651	22.0504	113.068	13.1193	15
20140517000651	22.0325	113.073	13.2863	13
20140517000651	22.04	113.073	12.85	15
20140517000651	22.0579	113.069	0	20
20140517000654	24.4463	113.733	12.0264	13
20140517000654	24.4541	113.737	12.0995	15
20140517000654	24.4257	113.72	11.3704	14
20140517000654	24.3991	113.709	6.46382	15
20140517000657	24.9527	113.836	37.9894	15
20140517000659	22.6969	114.766	0.124406	13
20140517000659	22.694	114.806	0	23
20140517000700	22.7166	114.771	1.25116	15
20140517000700	22.715	114.796	0	20
20140517000700	22.7544	114.69	0.692451	13
20140517000700	22.6599	114.952	0	23
20140517000700	22.6989	114.74	0	21
20140517000702	22.8589	113.811	6.15009	15
20140517000702	22.8633	113.81	8.1399	15
20140517000702	22.8642	113.81	8.14036	15
20140517000702	22.8649	113.808	8.7757	13
20140517000702	22.8658	113.806	8.93004	13
20140517000702	22.8515	113.8	10.6464	13
20140517000702	22.849	113.799	12.7738	13
20140517000703	22.0627	113.053	12.2115	15
20140517000703	22.0735	113.05	14.3895	13
20140517000703	22.063	113.062	10.4064	15
20140517000703	22.0633	113.064	12.1987	13
20140517000704	22.0747	113.058	0	21
20140517000704	22.0208	113.065	11.7107	-13
20140517000707	22.7768	114.761	0.073683	15
20140517000707	22.7811	114.713	0.440263	13
20140517000707	22.7723	114.775	0	20
20140517000713	24.1068	113.785	3.12275	-15
20140517000713	24.0809	113.786	0	20
20140517000713	23.5527	113.402	51.4783	15
20140517000713	23.992	113.934	9.61873	15
20140517000713	24.0584	114.005	0	-21
20140517000716	21.8768	113.072	13.9462	15
20140517000716	22.0199	113.082	12.6392	32
20140517000716	21.9945	113.085	12.6961	13
20140517000716	24.1927	113.484	10.4438	15
20140517000716	21.9266	113.089	15.3476	15
20140517000716	21.9075	113.12	11.2441	13
20140517000716	22	113.086	12.6285	13
20140517000716	22.0259	113.081	12.2123	13
20140517000716	22.0137	113.086	12.4711	13
20140517000716	22.0755	113.137	10.478	13
20140517000716	22.0463	113.1	12.1998	15
20140517000716	22.0145	113.098	13.9347	15
20140517000716	22.0366	113.029	8.28913	-13
20140517000716	22.0283	113.113	10.6276	13
20140517000716	22.0351	113.111	9.8647	15
20140517000717	22.0895	113.17	9.27072	13
20140517000717	22.0175	113.189	13.376	-13
20140517000719	22.7601	114.757	0.80752	15
20140517000719	18.2026	110.136	0	21
20140517000721	23.8924	113.41	9.33268	15
20140517000721	23.9035	113.412	10.8793	15
20140517000724	24.1212	113.679	0	-21
20140517000724	24.0901	113.658	0	-21
20140517000724	24.1427	113.788	0	-21
20140517000724	24.1146	113.631	0	-23
20140517000725	22.0983	113.118	11.6252	13
20140517000725	22.1175	113.119	12.6127	15
20140517000725	22.092	113.127	13.9008	13
20140517000725	22.0924	113.081	14.347	-13
20140517000725	22.1092	113.123	12.612	15
20140517000725	22.1059	113.081	13.9845	-15
20140517000725	22.094	113.08	14.5576	15
20140517000727	23.8873	113.356	9.81743	15
20140517000728	23.8827	113.35	12.1754	-13
20140517000728	23.8623	113.339	11.2225	-13
20140517000728	23.8184	113.354	11.3451	-15
20140517000728	23.7947	113.392	10.4685	-15
20140517000728	23.8185	113.409	8.70032	-15
20140517000728	23.8553	113.413	10.9947	15
20140517000728	22.9213	114.436	11.2151	15
20140517000728	22.9242	114.421	0.392353	13
20140517000728	22.9257	114.481	0.403035	15
20140517000729	22.7226	114.784	0.432248	15
20140517000733	21.7429	112.968	13.4959	13
20140517000733	21.7659	112.969	14.0886	15
20140517000733	21.7495	112.968	16.517	13
20140517000734	23.6494	114.098	8.60906	15
20140517000734	23.6285	114.09	7.77922	15
20140517000734	23.6947	114.136	0	-21
20140517000735	23.772	113.227	7.70676	15
20140517000735	23.7922	113.233	8.37337	15
20140517000735	23.7756	113.222	0	21
20140517000735	23.785	113.231	9.28152	15
20140517000735	23.7832	113.229	7.60901	15
20140517000735	22.554	113.691	9.14033	13
20140517000735	22.5501	113.687	11.0936	15
20140517000735	22.677	114.557	0.166277	15
20140517000735	22.6712	114.586	0.417828	15
20140517000735	22.5313	113.719	7.45402	15
20140517000736	22.4685	113.789	0.762697	-15
20140517000736	22.5141	113.745	8.18546	15
20140517000736	22.4721	113.727	9.69393	-15
20140517000738	22.773	114.783	0.668891	13
20140517000741	22.0385	113.081	11.8085	13
20140517000741	22.0404	113.081	12.4994	13
20140517000741	22.0529	113.08	12.9686	15
20140517000741	22.0486	113.082	14.2795	13
20140517000741	22.0549	113.081	13.9642	13
20140517000742	22.0561	113.081	11.928	13
20140517000742	21.9983	113.02	15.1516	13
20140517000742	22.0579	113.125	11.9211	13
20140517000742	22.0468	113.05	13.0562	13
20140517000744	24.1355	113.682	8.88416	13
20140517000744	22.8655	113.796	6.35509	32
20140517000744	22.8711	113.79	8.37927	15
20140517000744	22.8678	113.805	7.37339	15
20140517000744	22.8676	113.808	8.42287	13
20140517000744	22.8701	113.808	9.46084	13
20140517000744	22.8732	113.801	10.7521	15
20140517000744	22.8702	113.8	12.2629	13
20140517000744	22.8658	113.806	5.84064	15
20140517000744	24.1187	113.702	11.6454	15
20140517000744	22.8546	113.778	11.0286	15
20140517000748	23.9377	113.6	7.34268	-13
20140517000749	22.7665	114.736	5.0405	-13
20140517000749	22.7603	114.789	0.727871	-15
20140517000749	22.7546	114.785	0.126424	-13
20140517000749	20.9883	112.8	21.9445	-15
20140517000749	22.7509	114.771	0	-20
20140517000749	21.2591	112.819	0	-20
20140517000749	22.7473	114.801	0	-20
20140517000749	22.7406	114.813	0	-21
20140517000749	21.1157	112.806	0	-21
20140517000749	22.7462	114.802	0	-22
20140517000749	22.742	114.788	0	-23
20140517000759	22.0267	113.145	11.1842	-13
20140517000801	22.7788	114.768	0.286407	13
20140517000802	22.8157	113.864	1.9778	15
20140517000802	22.8251	113.833	8.66628	15
20140517000802	22.8152	113.849	8.81587	13
20140517000802	22.6573	114.924	0.578593	-13
20140517000802	22.8542	113.858	5.28404	-13
20140517000802	22.7748	113.908	4.3251	15
20140517000802	22.8155	113.864	0	23
20140517000802	22.8989	113.916	0	-20
20140517000802	22.8599	113.673	0	-20
20140517000802	22.841	113.722	8.1188	15
20140517000804	21.7225	112.986	14.2993	13
20140517000804	21.7838	112.981	13.4894	15
20140517000804	21.7891	113.025	9.34983	15
20140517000804	21.7343	112.982	13.6297	15
20140517000807	22.1103	113.131	11.4472	13
20140517000807	22.0857	113.14	12.8801	15
20140517000807	22.0938	113.143	13.0858	13
20140517000807	22.0933	113.171	12.4257	-13
20140517000807	22.0524	113.183	9.84397	13
20140517000810	22.4469	113.575	7.36477	15
20140517000810	22.4572	113.567	7.90418	15
20140517000810	22.4435	113.583	10.3385	15
20140517000810	22.4516	113.57	7.39677	15
20140517000810	22.4239	113.552	8.9241	-15
20140517000814	22.7001	114.79	0	22
20140517000814	22.6818	114.956	0.697219	-15
20140517000814	22.7081	114.752	0	22
20140517000814	24.1365	113.685	0	-20
20140517000814	24.1315	113.709	0	-21
20140517000814	24.1627	113.694	9.9419	-15
20140517000814	24.155	113.7	0	-20
20140517000814	24.1498	113.715	9.59901	-13
20140517000814	24.1522	113.694	0	-20
20140517000814	24.09	113.655	0	-20
20140517000814	24.1616	113.702	0	-21
20140517000815	24.5318	114.077	0.198848	15
20140517000815	24.1643	113.704	0	-21
20140517000815	22.5661	113.678	10.2342	13
20140517000816	22.5529	113.698	9.54606	13
20140517000816	22.5765	113.66	10.9048	15
20140517000816	22.512	113.722	9.19615	15
20140517000819	25.5478	112.174	24.1242	-13
20140517000819	25.3781	112.236	0	-21
20140517000819	25.2083	112.278	0	-20
20140517000822	25.9662	114.281	0	-20
20140517000825	22.0062	113.115	14.7921	13
20140517000825	22.0484	113.105	0	21
20140517000825	22.0195	113.077	11.2176	15
20140517000825	22.0076	113.115	14.3573	15
20140517000825	22.1537	113.087	9.53767	15
20140517000825	22.0509	113.062	11.5208	15
20140517000827	23.8888	113.358	0	-20
20140517000827	23.8935	113.351	6.81037	15
20140517000827	23.889	113.352	0.01655	15
20140517000827	23.8999	113.363	0	-20
20140517000827	22.7647	114.786	0.112367	13
20140517000827	23.8987	113.363	6.81891	15
20140517000827	23.8536	113.344	0	-20
20140517000827	23.8565	113.385	6.3079	15
20140517000827	23.8869	113.396	9.12602	13
20140517000827	23.8746	113.353	0	-20
20140517000827	23.9079	113.401	7.70928	-15
20140517000827	22.6877	115.023	0	21
20140517000827	23.8706	113.351	0	-20
20140517000827	23.9179	113.402	8.32972	-13
20140517000827	23.8836	113.358	0	-21
20140517000827	22.7567	114.817	0	23
20140517000827	23.8681	113.348	0	-21
20140517000828	22.7194	114.834	0	22
20140517000829	24.2555	113.538	10.8442	15
20140517000829	24.2266	113.522	11.9383	15
20140517000829	24.2535	113.535	11.4712	13
20140517000834	22.8621	113.82	3.97555	15
20140517000834	22.8625	113.817	6.38396	15
20140517000834	22.8652	113.824	6.9016	13
20140517000834	22.8641	113.82	6.18542	13
20140517000834	22.8888	113.827	8.69027	13
20140517000834	22.8802	113.799	10.9221	15
20140517000834	22.8869	113.809	11.3398	15
20140517000834	21.1309	112.864	0	-20
20140517000834	21.0977	112.862	0	-21
20140517000835	21.1165	112.864	0	-20
20140517000835	22.9303	114.484	0.355746	15
20140517000835	22.9273	114.463	0.347286	13
20140517000836	22.6991	114.813	0.035458	15
20140517000836	22.663	115.155	0	22
20140517000836	22.045	113.027	12.8273	13
20140517000837	22.6941	114.865	0	23
20140517000837	22.6977	114.802	1.04937	13
20140517000837	22.0524	113.033	13.783	13
20140517000837	22.7271	114.813	0.019115	-13
20140517000837	22.6983	114.797	0	21
20140517000837	22.0298	113.028	0	20
20140517000837	22.1319	113.11	11.7539	13
20140517000837	22.145	113.11	12.5875	13
20140517000837	22.1299	113.114	13.1277	13
20140517000837	22.0255	113.029	11.9872	13
20140517000837	22.0226	113.03	12.023	13
20140517000837	22.0267	113.028	12.1366	15
20140517000837	22.1442	113.107	0	21
20140517000840	21.7247	113.004	15.2715	15
20140517000840	21.7445	112.962	11.9461	15
20140517000840	21.783	113	15.6843	-13
20140517000840	21.7198	113.009	14.7707	15
20140517000840	21.7304	112.991	16.965	15
20140517000842	22.7735	114.686	0	22
20140517000845	23.858	113.35	10.4088	15
20140517000845	23.8503	113.345	9.52791	13
20140517000851	22.5448	113.695	6.8232	15
20140517000851	22.5383	113.709	6.37176	15
20140517000851	22.5514	113.69	10.9575	13
20140517000851	22.5336	113.716	6.74083	15
20140517000851	22.5237	113.717	9.10532	15
20140517000851	22.5477	113.698	5.96384	15
20140517000851	22.7465	114.877	0	20
20140517000851	22.5198	113.704	0.162035	13
20140517000852	22.4986	113.693	10.1446	15
20140517000852	22.4886	113.721	0.041418	15
20140517000852	22.4799	113.712	2.96599	-15
20140517000852	22.5059	113.685	9.81383	-15
20140517000852	22.7263	114.987	0.304986	15
20140517000852	22.7126	115.071	0.20933	-13
20140517000852	22.7115	114.793	0	22
20140517000852	22.4587	113.791	7.08247	-15
20140517000853	23.5829	114.13	0.175536	15
20140517000853	23.618	114.101	9.06308	13
20140517000853	23.6222	114.103	10.3617	13
20140517000853	23.5599	114.186	6.46405	15
20140517000854	22.7316	114.785	0.075058	13
20140517000854	24.3614	113.7	0.138928	-15
20140517000854	24.1073	113.716	4.57639	-15
20140517000854	24.1993	113.777	6.86954	-15
20140517000854	24.0894	113.715	0	-20
20140517000854	23.5744	113.407	46.9712	15
20140517000854	24.1361	113.729	0	-20
20140517000854	24.1022	113.687	0	-20
20140517000855	24.1069	113.716	0	-20
20140517000855	24.1205	113.693	0.002824	-15
20140517000855	24.0958	113.683	0	-20
20140517000901	25.3388	112.399	0	-20
20140517000901	22.11	113.133	11.5397	13
20140517000901	22.1209	113.134	11.6401	13
20140517000901	22.1179	113.13	13.7889	13
20140517000901	22.0176	113.051	12.8488	13
20140517000901	22.0343	113.055	14.0158	13
20140517000901	22.0235	113.061	13.834	13
20140517000901	22.1103	113.155	10.3429	15
20140517000901	22.1373	113.147	10.9233	15
20140517000901	22.1198	113.128	10.4603	-15
20140517000901	22.1293	113.128	10.26	15
20140517000901	22.1183	113.137	11.2013	13
20140517000901	22.0659	113.071	11.2352	15
20140517000901	22.0664	113.066	9.62428	15
20140517000902	23.779	113.231	8.91627	13
20140517000905	22.7105	114.918	0.664827	13
20140517000905	22.7845	113.797	7.12085	13
20140517000905	22.7925	113.8	4.44945	13
20140517000905	22.8024	113.808	3.96592	13
20140517000905	22.845	113.787	11.6749	13
20140517000905	22.7901	113.801	5.84306	13
20140517000905	22.7065	114.976	0.305081	15
20140517000905	22.7029	114.813	0	-23
20140517000905	22.7082	114.746	0.167718	15
20140517000905	22.7434	114.86	0.230801	15
20140517000905	22.7062	114.797	0	-21
20140517000906	22.5245	113.724	7.20841	15
20140517000906	22.5056	113.784	5.25108	-15
20140517000906	22.5366	113.712	7.09873	15
20140517000906	22.5163	113.724	5.41086	13
20140517000906	22.5774	113.661	13.1785	15
20140517000908	22.856	113.807	0.125191	-13
20140517000908	22.8529	113.81	0.100261	-15
20140517000908	22.8571	113.813	0.000486	-15
20140517000908	22.8701	113.817	0	-22
20140517000908	22.8713	113.818	0.068294	-13
20140517000910	24.1576	113.69	0	-21
20140517000910	24.1239	113.669	0	-20
20140517000910	24.0507	113.617	0	-20
20140517000910	24.1416	113.68	0	-20
20140517000910	24.1464	113.686	0	-21
20140517000910	24.0963	113.65	0	-21
20140517000910	24.1409	113.681	0	-21
20140517000911	24.1837	113.705	0	-21
20140517000912	23.8909	113.371	8.83432	15
20140517000914	25.198	112.445	36.0533	-15
20140517000916	21.7122	113.012	12.8044	13
20140517000916	22.7031	114.76	0	22
20140517000916	22.6716	114.909	0.209092	15
20140517000916	22.7062	114.743	0	21
20140517000916	21.7563	112.996	14.2715	15
20140517000916	21.7115	112.991	15.5732	13
20140517000917	22.7105	114.853	0	22
20140517000921	21.9587	113.062	10.8674	15
20140517000921	21.9475	113.065	13.809	13
20140517000921	21.952	113.067	14.3863	13
20140517000921	21.9347	113.07	13.352	13
20140517000921	22.0055	113.073	12.3407	15
20140517000921	21.9863	113.062	13.1553	13
20140517000921	22.1729	113.124	0	20
20140517000922	23.9179	113.594	9.6493	15
20140517000922	23.9078	113.592	4.18224	15
20140517000922	23.627	114.111	6.36065	-15
20140517000922	23.6303	114.116	4.46191	-15
20140517000922	23.6307	114.114	0.073913	-15
20140517000922	23.6236	114.105	0.329024	-15
20140517000922	23.6357	114.122	0	-21
20140517000922	23.6296	114.135	0	-20
20140517000923	22.5354	113.719	8.67505	15
20140517000923	22.5324	113.701	10.3823	15
20140517000923	22.5368	113.696	10.6612	15
20140517000923	22.5472	113.733	9.11823	15
20140517000923	22.5259	113.71	10.8217	13
20140517000924	24.805	112.408	32.7121	-14
20140517000925	25.1199	112.304	27.7949	-15
20140517000925	25.1258	112.304	0	-20
20140517000925	25.3347	112.25	0	-20
20140517000927	22.6862	115.01	1.28792	13
20140517000927	22.6742	115.132	0.156345	15
20140517000927	22.7245	114.864	0.115115	15
20140517000927	22.6956	114.869	1.55749	15
20140517000927	22.7354	114.957	0.267021	-15
20140517000927	22.0892	113.05	11.2624	15
20140517000927	22.0545	113.057	14.3311	13
20140517000928	22.0481	113.063	13.4378	13
20140517000928	22.0335	113.109	15.4518	-15
20140517000928	22.0091	113.11	15.5159	-15
20140517000928	22.0213	113.073	14.322	-15
20140517000929	22.9269	114.499	0.63312	15
20140517000929	22.9251	114.567	0.46927	15
20140517000929	22.9092	114.505	0.383833	15
20140517000935	22.7139	114.898	0.055474	15
20140517000935	22.7181	114.776	0.356292	13
20140517000935	22.7095	114.816	0.019819	13
20140517000936	22.5414	113.713	0	-22
20140517000936	22.5448	113.704	0.058843	-15
20140517000936	22.5283	113.739	0	-20
20140517000936	22.5582	113.69	0.018289	-15
20140517000936	22.5934	113.621	0.026069	-15
20140517000936	22.5429	113.712	0	-21
20140517000936	22.5709	113.679	0	-21
20140517000936	22.5124	113.726	4.04788	15
20140517000936	22.571	113.679	0	-21
20140517000936	22.4663	113.731	5.87812	-15
20140517000937	24.1304	113.81	9.29651	-15
20140517000937	24.1351	113.79	0	-20
20140517000941	22.7574	114.774	0	-20
20140517000941	22.785	114.772	0	-22
20140517000941	22.7304	114.821	0	-23
20140517000942	22.8102	114.819	0	-21
20140517000942	22.7145	114.885	0.121709	13
20140517000942	22.8179	114.755	0	-21
20140517000942	22.8106	114.791	0	-20
20140517000942	22.8107	114.776	0	-21
20140517000942	22.8076	114.805	0	-21
20140517000943	22.5248	113.737	4.0966	13
20140517000943	22.3237	113.574	8.11222	15
20140517000943	22.3373	113.565	7.28223	15
20140517000943	22.3391	113.564	8.98882	15
20140517000943	22.3301	113.576	11.7419	15
20140517000944	22.3389	113.645	0	22
20140517000945	22.7194	114.912	0.325571	-13
20140517000945	22.7151	114.823	0	22
20140517000946	22.4409	113.595	6.40488	13
20140517000946	22.439	113.599	6.29549	15
20140517000946	22.447	113.59	7.02303	15
20140517000946	22.4418	113.599	8.61808	13
20140517000946	22.4447	113.597	8.18364	15
20140517000946	22.4371	113.58	8.28689	15
20140517000946	22.4247	113.593	8.55215	15
20140517000946	22.5069	113.566	0	-21
20140517000946	22.4643	113.525	4.3909	15
20140517000947	22.055	113.059	12.2818	15
20140517000947	22.0227	113.067	14.4823	13
20140517000947	22.0399	113.06	14.0563	13
20140517000947	22.0302	113.087	13.4826	-13
20140517000947	22.0578	113.08	12.0386	13
20140517000947	22.0588	113.079	11.28	13
20140517000948	22.044	113.114	10.9562	15
20140517000948	22.0578	113.058	14.6192	15
20140517000948	22.0199	113.101	13.5124	-13
20140517000948	24.1209	113.692	0	-20
20140517000948	22.0241	113.127	11.048	13
20140517000948	24.1273	113.692	0	-20
20140517000948	24.0958	113.672	0	-20
20140517000948	24.1226	113.69	0	-20
20140517000948	24.1203	113.69	0	-21
20140517000948	24.1264	113.694	0	-21
20140517000952	23.9173	113.326	9.59768	15
20140517000952	23.9048	113.32	9.61072	15
20140517000952	23.9134	113.325	11.366	13
20140517000958	22.0938	113.133	11.4699	15
20140517000958	22.1019	113.133	11.4854	15
20140517000958	22.1118	113.134	12.428	13
20140517000958	22.1105	113.137	14.3322	15
20140517000958	22.109	113.135	13.928	13
20140517000958	23.6276	114.062	0	-20
20140517000958	23.6118	114.109	0	-22
20140517000958	23.6144	114.115	0	-20
20140517000958	23.6213	114.083	6.74489	-15
20140517000958	23.6375	114.087	0	-21
20140517000958	22.1362	113.154	9.56247	13
20140517000958	22.115	113.151	10.5044	-15
20140517000959	22.0846	113.174	9.18266	-15
20140517001000	22.7748	114.811	0	22
20140517001000	22.781	114.784	2.35482	15
20140517001008	24.0896	113.715	0	-20
20140517001008	24.1089	113.729	0	-20
20140517001008	24.1234	113.755	9.39631	-15
20140517001009	24.2168	113.499	13.4926	15
20140517001009	24.2009	113.494	8.94844	15
20140517001009	24.2396	113.509	0	20
20140517001012	22.9322	114.469	0.053735	13
20140517001012	22.9364	114.464	0.098692	15
20140517001012	22.9571	114.571	0	-20
20140517001012	21.7837	112.963	0	20
20140517001012	22.9538	114.558	0.135148	-13
20140517001012	21.6904	112.992	16.1925	-13
20140517001012	21.7688	112.958	0	-20
20140517001013	22.0647	113.056	12.2546	13
20140517001013	22.0477	113.062	14.3061	13
20140517001013	22.0707	113.066	0	21
20140517001013	22.0156	113.04	13.536	13
20140517001013	22.0532	113.068	10.9827	-13
20140517001013	21.9864	113.086	15.4714	-13
20140517001013	21.9933	113.077	12.334	-15
20140517001014	21.9908	113.07	15.3396	-13
20140517001014	21.9963	113.099	10.7866	13
20140517001016	24.4043	113.953	12.7962	13
20140517001017	24.4375	113.984	15.8799	15
20140517001019	22.7447	114.802	0.072594	15
20140517001019	22.751	114.763	0.041153	15
20140517001019	22.7247	114.952	0.058476	15
20140517001023	22.15	113.143	11.8216	13
20140517001023	22.1822	113.147	14.3675	15
20140517001023	22.1755	113.147	14.4174	15
20140517001024	22.1318	113.121	13.6693	-13
20140517001026	22.6748	114.577	0	23
20140517001026	22.6701	114.572	0.105193	13
20140517001026	22.6746	114.524	0.166865	15
20140517001030	21.9818	113.066	11.9018	-15
20140517001030	21.9683	113.082	0	-20
20140517001030	21.966	113.085	0	-20
20140517001030	21.9433	113.087	0	-20
20140517001031	23.9029	113.381	9.37308	15
20140517001031	23.9029	113.381	9.37308	15
20140517001031	23.8678	113.367	10.1522	15
20140517001031	23.8743	113.371	9.90199	15
20140517001031	23.8833	113.357	12.5867	13
20140517001031	23.8781	113.349	14.0364	15
20140517001031	21.9298	113.079	9.09245	-13
20140517001031	21.8947	113.093	9.5575	-15
20140517001031	23.9212	113.415	11.8764	13
20140517001031	21.8707	113.078	9.9604	-13
20140517001031	21.8938	113.073	0	-21
20140517001031	23.871	113.346	12.2539	15
20140517001031	23.8587	113.402	6.91487	-13
20140517001031	23.908	113.416	6.59152	13
20140517001031	23.9123	113.426	0	-20
20140517001031	23.8368	113.351	8.42699	-15
20140517001031	21.8713	113.075	6.62924	-13
20140517001032	22.6851	114.915	0	22
20140517001032	22.7335	114.816	1.65289	15
20140517001032	22.7361	114.835	6.26186	15
20140517001032	22.7492	114.784	6.60694	15
20140517001032	22.6863	114.828	0.284622	15
20140517001033	22.8573	113.811	0.069864	-15
20140517001033	22.8562	113.811	0.124039	-15
20140517001033	22.8552	113.804	0.745134	-15
20140517001033	22.8546	113.802	0.602141	-15
20140517001033	22.8545	113.802	0.189705	-15
20140517001033	22.8572	113.794	0.158913	-15
20140517001033	22.8551	113.797	0.116585	-15
20140517001033	22.8571	113.793	0.432558	-15
20140517001033	22.8555	113.787	0.055676	-15
20140517001033	22.8583	113.777	0.669337	-15
20140517001033	22.8564	113.809	0.017836	15
20140517001033	22.8691	113.831	0.029405	-15
20140517001033	22.8912	113.789	0	-20
20140517001033	22.868	113.808	0	22
20140517001033	22.8902	113.799	0	-20
20140517001033	22.8905	113.869	0	-20
20140517001033	22.8746	113.841	4.96176	-15
20140517001033	22.8589	113.842	0.031528	13
20140517001033	22.8658	113.797	0.138936	-15
20140517001033	22.8938	113.775	0	-20
20140517001033	22.8912	113.796	0	-20
20140517001033	22.8456	113.851	0	21
20140517001033	22.8289	113.849	0	-22
20140517001033	22.8909	113.8	0	-20
20140517001033	22.8368	113.824	6.61142	15
20140517001033	22.8911	113.797	0	-21
20140517001033	22.8916	113.796	0	-20
20140517001033	22.8911	113.798	0	-21
20140517001034	22.8922	113.793	0	-20
20140517001034	22.5279	113.735	8.06185	15
20140517001034	22.5574	113.691	9.75809	13
20140517001034	22.5192	113.744	7.12276	15
20140517001034	22.5202	113.737	8.54099	13
20140517001034	22.5078	113.75	7.14676	15
20140517001035	23.6256	114.11	4.66509	-13
20140517001035	23.6134	114.08	0.375694	-15
20140517001035	23.6408	114.129	0	-20
20140517001035	23.6413	114.132	0	-20
20140517001035	23.6262	114.116	6.11545	-15
20140517001035	23.6428	114.131	0	-20
20140517001035	23.6476	114.139	0	-20
20140517001039	22.859	113.887	3.49891	15
20140517001039	22.8402	113.962	0.226143	15
20140517001039	22.8612	113.883	0.279469	13
20140517001039	22.8616	113.891	2.17896	13
20140517001039	22.8623	113.895	2.50719	13
20140517001039	22.8276	113.887	1.16077	-13
20140517001039	22.8658	113.869	5.54484	-13
20140517001039	22.77	113.907	0.021987	15
20140517001039	22.7788	113.919	4.63827	15
20140517001039	22.8569	113.881	0.012387	15
20140517001040	20.7693	111.705	0	21
20140517001042	22.7796	114.798	0.085029	13
20140517001042	21.1434	112.829	21.6208	15
20140517001043	24.1523	113.767	0	-20
20140517001043	24.1138	113.803	0	-21
20140517001043	22.7788	114.805	0.421244	15
20140517001043	24.1409	113.758	0	-20
20140517001043	24.1229	113.745	0	-20
20140517001043	24.1578	113.77	0	-20
20140517001043	24.1409	113.758	0	-20
20140517001043	24.1495	113.763	0	-21
20140517001043	24.108	113.732	10.3865	-13
20140517001045	21.7356	112.984	13.6209	15
20140517001045	21.7908	112.983	13.8636	13
20140517001046	23.9148	113.328	10.3727	15
20140517001046	23.9008	113.318	11.2418	15
20140517001046	22.072	113.072	11.8687	15
20140517001047	22.174	113.152	10.7315	15
20140517001047	22.0656	113.088	10.7349	13
20140517001047	22.0606	113.09	13.7079	15
20140517001047	22.0783	113.087	12.6204	13
20140517001051	22.7065	114.837	0.560557	32
20140517001053	23.9277	113.603	9.16259	13
20140517001053	23.9268	113.602	8.80096	13
20140517001053	23.9386	113.61	11.5543	15
20140517001053	23.9325	113.601	10.1396	15
20140517001053	23.9217	113.594	9.2088	15
20140517001056	24.1528	113.736	0	-20
20140517001056	22.787	113.796	7.1245	15
20140517001056	24.1258	113.687	0	-20
20140517001056	24.1417	113.725	3.44435	-13
20140517001056	24.1542	113.71	0	-21
20140517001056	24.1167	113.706	0	-20
20140517001056	24.1311	113.718	0	-20
20140517001056	24.1462	113.673	10.6306	15
20140517001056	24.1193	113.707	0	-20
20140517001056	24.3126	113.8	0	-20
20140517001056	22.7946	113.823	9.36693	-15
20140517001058	21.7321	113.048	12.022	15
20140517001058	21.8085	113.055	10.6125	15
20140517001059	23.6187	114.099	0.115056	-13
20140517001059	23.6206	114.082	0	-20
20140517001059	23.6232	114.097	0.617271	-15
20140517001059	23.6158	114.078	0	-21
20140517001059	23.6114	114.07	0	-21
20140517001059	23.615	114.074	0	-21
20140517001059	23.6159	114.076	0	-21
20140517001101	22.7339	114.736	0.432889	15
20140517001102	22.7482	114.736	0.496142	15
20140517001102	22.752	114.671	0	-20
20140517001102	22.7341	114.805	0.847646	15
20140517001102	22.7502	114.694	0.402384	-15
20140517001102	22.7502	114.694	0.402384	-13
20140517001102	22.7497	114.7	0.314221	-13
20140517001102	22.7506	114.69	0.189739	-13
20140517001102	22.7426	114.746	0.608644	13
20140517001102	22.7498	114.694	0.120354	-13
20140517001106	22.0306	113.117	12.0722	15
20140517001106	22.7031	114.818	0.494272	15
20140517001106	22.0578	113.088	12.1251	13
20140517001107	22.6929	114.862	0.149874	13
20140517001107	22.697	114.844	0.967551	13
20140517001107	22.0164	113.074	10.548	-13
20140517001107	22.6427	114.953	0.493381	15
20140517001107	22.1321	113.103	0	21
20140517001107	22.0468	113.126	0	21
20140517001107	22.0938	113.144	0.177635	-13
20140517001107	22.0253	113.168	13.4919	13
20140517001108	22.0016	113.133	8.13957	-13
20140517001109	22.0583	113.087	5.87023	-15
20140517001109	22.0705	113.08	0	-21
20140517001109	21.9601	113.134	10.5593	15
20140517001109	21.9528	113.151	10.8782	13
20140517001110	22.537	113.722	6.62091	15
20140517001110	22.5376	113.705	6.55014	15
20140517001110	22.5174	113.738	10.7077	13
20140517001110	22.5303	113.73	0	22
20140517001117	22.1483	113.162	10.5128	15
20140517001117	22.1455	113.164	11.376	15
20140517001117	22.1435	113.132	14.2935	13
20140517001120	22.7278	114.836	0	-20
20140517001120	22.7241	114.847	0	-20
20140517001120	22.7151	114.856	0	-20
20140517001120	22.7322	114.801	0	-21
20140517001120	22.7302	114.82	0.569644	15
20140517001120	22.7166	114.858	0	-20
20140517001120	22.7158	114.86	0	-21
20140517001120	22.7631	114.874	0.467293	-15
20140517001120	22.7162	114.856	0	-20
20140517001120	22.6889	114.931	0.333585	13
20140517001127	23.6285	114.129	4.77419	-15
20140517001127	23.6251	114.131	0	-20
20140517001127	23.6221	114.131	0	-20
20140517001127	23.7119	114.273	0.121618	-13
20140517001127	22.7297	114.863	0	22
20140517001128	22.4461	113.578	8.60703	13
20140517001128	22.441	113.584	5.06453	15
20140517001128	22.4526	113.573	7.69742	15
20140517001128	22.4473	113.578	7.39141	15
20140517001128	22.4338	113.59	8.76408	15
20140517001128	22.4488	113.556	9.05607	15
20140517001132	22.3829	113.486	8.78897	13
20140517001133	24.5086	113.739	11.2386	15
20140517001133	24.5047	113.742	9.82419	15
20140517001133	24.4286	113.707	0	-20
20140517001133	24.4611	113.724	13.0701	15
20140517001135	21.9208	113.116	12.2691	15
20140517001135	21.8876	113.118	11.4229	15
20140517001135	21.9	113.116	13.1136	15
20140517001135	22.0516	113.047	13.5413	13
20140517001136	22.0118	113.064	14.9225	-32
20140517001136	22.0452	113.052	11.3013	13
20140517001136	22.1171	113.028	14.8289	15
20140517001136	22.0481	113.074	13.5754	15
20140517001141	23.9014	113.325	10.224	15
20140517001141	23.9024	113.327	11.3424	13
20140517001141	23.8965	113.322	11.1837	13
20140517001142	23.89	113.317	9.58817	15
20140517001142	23.8963	113.319	8.89236	-15
20140517001142	23.8181	113.346	0.017415	15
20140517001143	22.1657	113.136	10.4501	-15
20140517001143	22.1307	113.137	16.3078	13
20140517001143	22.5311	113.687	8.57904	32
20140517001143	22.5648	113.641	10.341	13
20140517001144	22.5162	113.657	7.9533	15
20140517001144	21.7628	112.986	14.9278	13
20140517001144	21.7477	112.994	14.8708	15
20140517001144	22.5284	113.694	6.6568	13
20140517001144	22.546	113.686	9.90423	15
20140517001144	22.5784	113.654	11.0587	13
20140517001144	22.518	113.708	0	21
20140517001144	22.5278	113.725	6.40595	13
20140517001144	21.7409	112.981	16.0712	15
20140517001144	21.775	113.017	13.8567	-15
20140517001144	22.7087	114.867	0	-20
20140517001144	22.7503	114.645	9.29757	15
20140517001145	22.7914	113.842	0	23
20140517001145	22.8283	113.832	0	-23
20140517001145	22.8104	113.831	3.60667	13
20140517001145	19.5371	110.85	0	21
20140517001145	22.8679	113.827	3.57343	15
20140517001145	22.7921	113.834	3.76743	-13
20140517001145	22.7925	113.834	0.052293	-13
20140517001152	24.1119	113.689	0	-20
20140517001152	23.6345	113.278	56.7062	15
20140517001152	24.1577	113.709	7.54901	15
20140517001152	24.1417	113.708	0	-20
20140517001152	24.1364	113.703	0	-20
20140517001152	24.1211	113.69	0	-20
20140517001152	24.1183	113.693	0	-20
20140517001152	24.1882	113.72	0	-21
20140517001153	24.1426	113.707	9.16344	-13
20140517001201	24.042	113.667	8.73674	15
20140517001202	22.775	114.814	0.126707	13
20140517001203	22.1496	113.168	11.1433	13
20140517001203	22.1491	113.17	11.225	13
20140517001203	22.1609	113.149	10.7387	15
20140517001203	22.1131	113.172	13.3565	13
20140517001203	23.8977	113.288	10.1136	15
20140517001203	23.9144	113.295	10.8182	15
20140517001204	25.576	112.329	0	-20
20140517001204	25.5523	112.359	0	-20
20140517001207	21.787	112.994	15.2406	15
20140517001212	24.1305	113.832	11.6344	15
20140517001212	24.1436	113.843	12.1426	13
20140517001212	24.1384	113.839	12.0472	13
20140517001212	24.143	113.843	0	21
20140517001212	24.1207	113.826	11.6796	13
20140517001212	24.8582	112.399	35.0915	15
20140517001212	24.1366	113.8	10.9828	-15
20140517001213	24.1135	113.81	0	21
20140517001213	24.1177	113.819	0	21
20140517001213	24.17	113.755	12.8425	15
20140517001213	25.2	112.281	0	21
20140517001213	24.1379	113.745	4.34281	-13
20140517001213	21.9397	113.099	12.3708	15
20140517001213	21.9605	113.1	14.0755	15
20140517001213	21.9211	113.036	15.4508	13
20140517001213	21.9712	113.094	14.802	13
20140517001213	22.0494	113.092	15.1971	15
20140517001214	22.0169	113.095	13.3157	15
20140517001214	21.94	113.114	14.441	-15
20140517001218	22.7239	114.82	0.088286	13
20140517001218	22.7218	114.822	0.180207	13
20140517001218	22.7304	114.838	0.177131	15
20140517001219	23.5843	114.211	7.3832	15
20140517001219	23.581	114.201	0.028809	15
20140517001219	23.5771	114.189	0.595727	15
20140517001219	23.6066	114.246	0.225355	15
20140517001219	23.5685	114.19	6.36157	13
20140517001219	23.5702	114.204	10.6499	15
20140517001219	23.5765	114.195	3.13927	15
20140517001219	23.625	114.282	0.703118	15
20140517001220	22.5188	113.675	9.07229	15
20140517001220	22.5175	113.685	8.29562	13
20140517001220	22.5213	113.679	8.03048	13
20140517001220	22.5161	113.749	8.78423	15
20140517001220	22.5574	113.706	6.16671	13
20140517001220	22.5301	113.73	10.1974	13
20140517001220	22.5459	113.708	11.5267	-13
20140517001220	21.7035	113.055	11.8497	15
20140517001220	21.7024	113.054	13.2764	15
20140517001220	22.5116	113.74	9.23339	15
20140517001220	22.4864	113.741	11.7791	-15
20140517001220	22.4916	113.746	8.28433	-15
20140517001223	23.8948	113.319	10.4843	13
20140517001223	23.8995	113.327	9.89623	-15
20140517001225	21.1228	112.831	22.802	-15
20140517001225	18.9036	112.649	46.1693	-15
20140517001225	21.1342	112.84	0	-21
20140517001225	22.7992	113.814	9.29061	15
20140517001225	22.8264	113.799	12.0737	13
20140517001225	22.8067	113.799	5.28914	15
20140517001225	22.8381	113.819	11.2611	-13
20140517001225	22.8015	113.818	4.9573	15
20140517001225	22.7992	113.821	5.37383	13
20140517001225	22.8002	113.823	0	20
20140517001225	22.8009	113.82	4.45006	14
20140517001225	22.8634	113.814	10.5862	-13
20140517001226	22.8264	113.852	0.114401	13
20140517001226	22.8664	113.822	4.47569	-13
20140517001226	22.8114	113.83	2.18387	15
20140517001226	22.864	113.844	0	21
20140517001226	22.8697	113.805	11.7125	-15
20140517001226	23.7851	113.258	8.55979	15
20140517001226	23.788	113.26	8.59988	15
20140517001230	22.6959	114.79	0	-21
20140517001230	22.6934	114.814	0	-21
20140517001230	22.6979	114.785	0	-21
20140517001230	22.7366	114.41	0.597616	15
20140517001230	22.6993	114.579	0.120336	15
20140517001230	22.6772	114.665	0.059077	15
20140517001230	22.6945	114.568	0.347762	15
20140517001230	22.595	114.671	0	-21
20140517001230	22.6932	114.582	0	-20
20140517001230	22.7085	114.655	0.56782	15
20140517001230	22.7078	114.881	0.127398	13
20140517001230	22.7321	114.878	0	21
20140517001231	22.707	114.823	0.130197	15
20140517001231	24.0747	113.553	0	22
20140517001231	24.0848	113.549	8.81158	13
20140517001231	24.0278	113.517	0	-21
20140517001231	22.1721	113.133	11.8142	13
20140517001232	22.2092	113.158	10.4426	13
20140517001232	22.1554	113.139	12.3219	15
20140517001232	22.1503	113.141	11.2466	15
20140517001232	22.1413	113.137	13.3622	13
20140517001232	22.1533	113.123	13.3338	15
20140517001232	22.1686	113.135	10.1562	15
20140517001232	24.1586	113.719	10.5658	-15
20140517001232	22.1802	113.147	13.3852	-15
20140517001232	23.6206	114.123	3.81779	-15
20140517001232	23.6201	114.149	0	-20
20140517001233	23.6439	114.13	0	-20
20140517001233	23.619	114.14	0.180625	-15
20140517001238	25.5002	112.532	0	-20
20140517001238	22.7305	114.742	0.082649	15
20140517001239	25.2185	113.563	38.8127	-15
20140517001239	22.1362	113.087	0	-20
20140517001239	22.104	113.096	0	-21
20140517001239	22.0865	113.099	8.09095	-13
20140517001239	22.0823	113.086	9.9115	-15
20140517001240	22.0912	113.098	0	-21
20140517001240	22.0844	113.098	10.2178	-13
20140517001240	22.0914	113.102	0	-21
20140517001240	22.0908	113.098	6.97039	-13
20140517001240	22.0913	113.099	7.08046	-13
20140517001240	22.0855	113.172	8.18179	-13
20140517001240	22.0849	113.099	6.27478	-13
20140517001243	22.7498	114.733	0	-20
20140517001243	22.7343	114.829	0	-21
20140517001243	22.7337	114.748	0	-21
20140517001243	22.7236	114.768	0.459113	-15
20140517001243	22.7472	114.551	1.15266	-15
20140517001243	22.7652	114.78	0	-21
20140517001243	22.6867	115.242	0	-23
20140517001244	22.7246	114.907	0	-22
20140517001246	24.185	113.751	0	-21
20140517001246	24.1766	113.75	9.76474	-13
20140517001246	24.1164	113.711	7.18876	-13
20140517001246	24.1687	113.747	4.57616	-13
20140517001247	22.907	114.515	0	23
20140517001247	22.9371	114.451	0	21
20140517001248	22.1108	113.116	12.1116	13
20140517001248	22.1127	113.116	12.3932	15
20140517001248	22.1252	113.116	13.2437	13
20140517001248	22.1142	113.122	14.7515	13
20140517001248	22.151	113.124	13.2304	15
20140517001251	21.9691	113.072	10.9933	-15
20140517001251	21.9645	113.073	11.4727	-15
20140517001251	21.9861	113.096	0	-21
20140517001251	21.9883	113.059	6.99779	-13
20140517001251	21.9901	113.095	0	-21
20140517001251	21.9746	113.098	7.7797	-13
20140517001251	21.9367	113.074	10.9971	-13
20140517001253	22.7244	114.828	0.279183	15
20140517001253	22.732	114.775	0.335437	13
20140517001254	22.6875	114.521	0	22
20140517001255	23.9133	113.408	9.57351	15
20140517001255	23.9083	113.405	9.05294	15
20140517001255	23.9157	113.411	10.4089	13
20140517001255	23.9027	113.402	8.59377	15
20140517001255	23.9074	113.402	11.0583	15
20140517001255	23.8988	113.402	12.6368	13
20140517001255	23.9103	113.404	7.92789	13
20140517001255	23.8722	113.358	13.2653	13
20140517001255	23.9591	113.633	10.216	15
20140517001255	23.9515	113.627	10.3016	15
20140517001255	23.9507	113.627	10.6775	13
20140517001255	23.9586	113.631	11.8892	15
20140517001255	23.914	113.406	8.93663	13
20140517001255	23.8342	113.37	9.92248	15
20140517001255	23.9339	113.594	12.2219	-15
20140517001304	22.0385	113.059	10.68	13
20140517001304	22.031	113.063	13.3598	15
20140517001304	22.0496	113.062	12.9529	15
20140517001304	22.0456	113.065	13.2669	13
20140517001304	22.0708	113.06	11.4181	15
20140517001304	22.0655	113.064	12.9165	15
20140517001304	22.0879	113.058	13.4674	15
20140517001304	22.0531	113.079	14.008	15
20140517001304	22.0015	113.061	13.3307	-13
20140517001304	22.0668	113.108	10.0106	-15
20140517001304	22.091	113.068	13.8385	15
20140517001304	21.9629	113.113	16.7919	-15
20140517001304	21.987	113.114	14.8595	-15
20140517001304	22.0278	113.14	11.0799	13
20140517001304	22.5327	113.707	8.71702	32
20140517001305	22.5397	113.695	11.2427	15
[truncated: 370,957+ more rows]
